# 1 **LOSS OF UBIQUITIN LIGASE STUB1 AMPLIFIES IFN $\gamma$ -R1/JAK1** 2 **SIGNALING AND SENSITIZES TUMORS TO IFN $\gamma$**

3  
4 Georgi Apriamashvili<sup>1,5</sup>, David W. Vredevoogd<sup>1,5</sup>, Oscar Krijgsman<sup>1,6</sup>, Onno B.  
5 Bleijerveld<sup>2,4,6</sup>, Maarten A. Ligtenberg<sup>1</sup>, Beaunelle de Bruijn<sup>1</sup>, Julia Boshuizen<sup>1</sup>,  
6 Daniela D'Empaire Altimari<sup>1</sup>, Nils L. Visser<sup>1</sup>, James D. Londino<sup>3</sup>, Maarten Altelaar<sup>2,4</sup>,  
7 Daniel S. Peeper<sup>1\*</sup>

8 <sup>1</sup>Division of Molecular Oncology and Immunology, Oncode Institute, The Netherlands  
9 Cancer Institute, Plesmanlaan 121, 1066 CX Amsterdam, The Netherlands

10 <sup>2</sup>Proteomics Core Facility, The Netherlands Cancer Institute, Plesmanlaan 121, 1066  
11 CX Amsterdam, The Netherlands

12 <sup>3</sup>Division of Pulmonary, Critical Care and Sleep Medicine, The Ohio State University  
13 Wexner Medical Center, 410W 10<sup>th</sup> Avenue, Columbus, Ohio, USA

14 <sup>4</sup>Biomolecular Mass Spectrometry and Proteomics, Bijvoet Center for Biomolecular  
15 Research and Utrecht Institute for Pharmaceutical Sciences, University of Utrecht, and  
16 Netherlands Proteomics Center, Padualaan 8, 3584 CH Utrecht, The Netherlands

17 <sup>5</sup>These authors contributed equally

18 <sup>6</sup>These authors contributed equally

19  
20  
21 \*Correspondence to:

22 Daniel S. Peeper

23 Oncode Institute

24 Netherlands Cancer Institute

25 Plesmanlaan 121

26 1066 CX, Amsterdam

27 The Netherlands

28 E-mail: [d.peeper@nki.nl](mailto:d.peeper@nki.nl)

29 Tel.: +31 20 512 2002

30

31

32

33 **Abstract**

34 Despite the success of immune checkpoint blockade (ICB) most patients fail to  
35 respond durably, in part owing to reduced interferon gamma (IFN $\gamma$ ) sensitivity. Thus,  
36 elevating tumor IFN $\gamma$ -receptor 1 (IFN $\gamma$ -R1) expression to enhance IFN $\gamma$ -mediated  
37 cytotoxicity is of potential clinical interest. Here, we show that increased IFN $\gamma$ -R1  
38 expression sensitizes tumors to IFN $\gamma$ -mediated killing. To unveil the largely undefined  
39 mechanism governing IFN $\gamma$ -R1 expression, we performed a genome-wide  
40 CRISPR/Cas9 screen for suppressors of its cell surface abundance. We uncovered  
41 STUB1 as key mediator of proteasomal degradation of the IFN $\gamma$ -R1/JAK1 complex.  
42 STUB1 inactivation amplified IFN $\gamma$  signaling, thereby sensitizing to cytotoxic T cells,  
43 but also inducing PD-L1. STUB1 loss in a rational combination with PD-1 blockade  
44 strongly inhibited melanomas *in vivo*. Clinically corroborating these results, a *STUB1*-  
45 KO gene signature was strongly associated with anti-PD-1 response. These results  
46 uncover STUB1 as pivotal regulator of IFN $\gamma$  tumor signaling and provide a rationale  
47 for its inhibition combined with anti-PD-1.

48

## 49 **Introduction**

50 Although immune checkpoint blockade (ICB) has been a major clinical success in the  
51 treatment of a variety of cancer indications, the majority of patients fail to show durable  
52 clinical responses<sup>1,2</sup>. This is caused by both upfront and acquired resistance  
53 mechanisms<sup>3-7</sup>, for which predictive biomarkers are being actively sought<sup>8-17</sup>. A  
54 common resistance mechanism relates to the insensitivity that tumors develop against  
55 cytokines secreted by cytotoxic T cells, including IFN $\gamma$  and TNF<sup>4,5,18,19</sup>. IFN $\gamma$  can  
56 promote antitumor activity indirectly, by inducing secretion of lymphocyte-attracting  
57 chemokines such as CXCL9, CXCL10 and CXCL11 and by skewing the attracted  
58 immune infiltrate to be more inflammatory. Conversely, IFN $\gamma$  can inhibit tumorigenesis  
59 directly, by improving antigen processing and presentation, and by inducing the  
60 expression of cell cycle inhibitors, such as p21<sup>Cip1</sup>, and pro-apoptotic proteins, such  
61 as caspase 1 and caspase 8<sup>20,21</sup>. Moreover, IFN $\gamma$  can sensitize tumor cells to other T  
62 cell-derived effector cytokines by increasing the expression of FAS and TRAIL  
63 receptors<sup>22,23</sup>.

64

65 In line with these biological functions, expression of IFN $\gamma$  response genes in tumors is  
66 associated with better responses to immunotherapy<sup>17,24</sup>. These clinical findings are  
67 underscored by preclinical research showing a critical role for IFN $\gamma$  in hindering  
68 tumorigenesis and maintaining tumor control<sup>25</sup>. Conversely, aberrations in the IFN $\gamma$   
69 response pathway, such as inactivation of JAK1, are associated with resistance to  
70 immunotherapy<sup>4,5,18</sup>.

71

72 Although the IFN $\gamma$  signaling pathway has been studied extensively, and different  
73 regulatory mechanisms of this pathway have been uncovered, less is known about the  
74 cell-autonomous regulation of the IFN $\gamma$  receptor 1 (IFN $\gamma$ -R1), the essential ligand-  
75 binding receptor chain for IFN $\gamma$ . Multiple experimental and clinical approaches have  
76 identified that tumor cells benefit from either loss or reduction in IFN $\gamma$ -R1 levels in the  
77 context of ICB therapy<sup>5</sup> or T cell pressure<sup>6,26,27</sup>.

78

79 However, to our knowledge the converse has not been studied. Specifically, the  
80 possibility that tumor cells with high (or induced) IFN $\gamma$ -R1 expression show increased  
81 sensitivity to IFN $\gamma$ -induced cytotoxicity has remained untested. Whereas disruption of  
82 IFN $\gamma$  signaling is an established cancer trait contributing to immune escape, a scenario

83 in which increased IFN $\gamma$  signaling would lead to increased T cell sensitivity may be of  
84 clinical interest. This is the first question we addressed in this study. The answer  
85 prompted a second one, namely, which mechanisms govern the expression of IFN $\gamma$ -  
86 R1. To address this, we performed a genome-wide CRISPR/Cas9 knockout screen.  
87 Lastly, we translated our findings to a preclinical setting, demonstrating their  
88 therapeutic and clinical relevance.

## 89 **Results**

### 90 **High IFN $\gamma$ -R1 expression results in increased sensitivity of tumor cells to T cell** 91 **killing**

92 Whereas it is established that loss of the IFN $\gamma$ -R1 ablates IFN $\gamma$  tumor signaling<sup>5,25</sup>, it  
93 is unknown whether the converse is also true. To assess whether increased  
94 abundance of IFN $\gamma$ -R1 augments the susceptibility of tumor cells to cytotoxic T cells,  
95 we took advantage of the heterogeneity we observed for its expression levels in the  
96 human melanoma cell line D10. We FACsorted tumor cells with high and low  
97 expression levels of IFN $\gamma$ -R1 (**Fig. 1a and b**). As a control protein, we determined the  
98 expression of another cell surface protein, PD-L1, which was expressed identically in  
99 the IFN $\gamma$ -R1<sup>High</sup> and IFN $\gamma$ -R1<sup>Low</sup> cell populations (**Fig. 1c**). We then investigated  
100 whether IFN $\gamma$ -R1<sup>High</sup> and IFN $\gamma$ -R1<sup>Low</sup> cells differentially responded to IFN $\gamma$ . By flow  
101 cytometry, we observed that IFN $\gamma$ -R1<sup>High</sup> cells induced PD-L1 to a greater extent upon  
102 IFN $\gamma$  treatment than IFN $\gamma$ -R1<sup>Low</sup> cells. This result indicates that the expression levels  
103 of the endogenous IFN $\gamma$ -R1 protein dictate the strength of the response to IFN $\gamma$  (**Fig.**  
104 **1c**). This effect had also a biological consequence: in a competition experiment, IFN $\gamma$   
105 treatment was two-fold more toxic to IFN $\gamma$ -R1<sup>High</sup> than to IFN $\gamma$ -R1<sup>Low</sup> cells  
106 (**Supplementary Fig. 1a and b**).

107

108 We repeated this experiment with cytotoxic T cells, employing the matched tumor  
109 HLA-A\*02:01<sup>+</sup>/MART1<sup>+</sup> and 1D3 TCR T cell system we previously developed<sup>19</sup>. In this  
110 experiment also, IFN $\gamma$ -R1<sup>High</sup> melanoma cells showed higher susceptibility to T cell  
111 killing than IFN $\gamma$ -R1<sup>Low</sup> cells (**Fig. 1d, e**). Thus, the expression level of IFN $\gamma$ -R1 is  
112 heterogeneous even in an established tumor cell line. More importantly, these results  
113 demonstrate that this variation has a biological consequence, in that higher IFN $\gamma$ -R1  
114 expression results in increased sensitivity of tumor cells to T cell killing.

115

### 116 **Whole genome CRISPR/Cas9 screen identifies regulators of IFN $\gamma$ -R1 expression**

117 Because this observation could have potential therapeutic relevance, it was important  
118 to first dissect the mechanism governing IFN $\gamma$ -R1 expression in an unbiased fashion.  
119 To identify novel regulators of cell surface-expressed IFN $\gamma$ -R1, we performed a  
120 CRISPR/Cas9 knockout screen (**Fig. 1f**). Cas9-expressing human D10 melanoma  
121 cells were lentivirally transduced with a genome-wide knockout library<sup>28</sup>, in duplicate.  
122 After two days of puromycin selection, we harvested a library reference sample. After

123 an additional eight days of culturing, we FACsorted both the lower (IFN $\gamma$ -R1<sup>Low</sup>) and  
124 upper (IFN $\gamma$ -R1<sup>High</sup>) 10% of IFN $\gamma$ -R1-expressing cell populations (as well as an  
125 unsorted bulk reference sample, **Fig. 1f**). Genomic DNA was isolated and sgRNA  
126 sequences were amplified by PCR. Analysis of the DNA sequencing data revealed a  
127 strong correlation between biological replicates (**Supplementary Fig. 1c**). By  
128 comparing the library reference with unsorted control samples, we confirmed  
129 significant depletion of known essential genes<sup>29</sup> (**Supplementary Fig. 1d**). These  
130 quality control measures illustrate the robustness of the screen.

131  
132 By MAGeCK analysis<sup>30</sup>, we identified several hits affecting IFN $\gamma$ -R1 expression (**Fig.**  
133 **1g**). Comparative analysis of the IFN $\gamma$ -R1<sup>High</sup> and IFN $\gamma$ -R1<sup>Low</sup> melanoma populations  
134 revealed that cells carrying sgRNAs targeting *IFNGR1* were most abundant in the  
135 latter population, again demonstrating the robustness of the screen (**Fig. 1g**). More  
136 interestingly, the E3 ubiquitin ligase STIP1 homology and U-box containing protein 1  
137 (STUB1, also known as CHIP and encoded by *STUB1*) was found as the strongest hit  
138 suppressing IFN $\gamma$ -R1 cell surface abundance. We also identified other genes  
139 negatively affecting IFN $\gamma$ -R1 expression, including Ancient ubiquitous protein 1 and  
140 Uroporphyrinogen Decarboxylase (encoded by *AUP1* and *UROD*, respectively). We  
141 performed the same IFN $\gamma$ -R1 regulator screen in a second human melanoma cell line,  
142 SK-MEL-23, which was similar in quality (**Supplementary Fig. 1e**) and also identified  
143 STUB1 and UROD (**Supplementary Fig. 1f**).

144  
145 To validate these screen hits, we inactivated either *STUB1*, *AUP1* or *UROD* using two  
146 independent sgRNAs for each gene. Whereas cells expressing sg*IFNGR1* showed a  
147 near-complete loss of IFN $\gamma$ -R1 expression, inactivation of either *STUB1* or *UROD*, and  
148 to a lesser extent *AUP1*, instead resulted in a robust increase of IFN $\gamma$ -R1 abundance  
149 (**Fig. 1h**).

150

### 151 **STUB1 specifically regulates the cell surface fraction of IFN $\gamma$ -R1**

152 To determine whether STUB1 functions as a negative regulator of IFN $\gamma$ -R1 expression  
153 beyond melanoma, we depleted it by Cas9-mediated knockout from cell lines  
154 originating from different tumor indications, and assessed the effect on the expression  
155 of IFN $\gamma$ -R1. We again observed strong induction of IFN $\gamma$ -R1 expression in all cell lines

156 tested, indicating that STUB1 has a key role in limiting IFN $\gamma$ -R1 expression across  
157 different tumor types (**Fig. 2a and b**).

158

159 This broad effect prompted us to mechanistically dissect how STUB1 regulates IFN $\gamma$ -  
160 R1 expression. qPCR analysis for *IFNGR1* showed that its transcript levels were  
161 indistinguishable between WT and *STUB1*-deficient cells (**Supplementary Fig. 2a**).  
162 Therefore, we focused our attention on a post-transcriptional mode of regulation. We  
163 first determined in which cellular compartment STUB1 regulates IFN $\gamma$ -R1 expression.  
164 Cell lysates of *STUB1*-proficient and *STUB1*-deficient cells were treated with various  
165 deglycosylating enzymes. The strongest increase in IFN $\gamma$ -R1 was seen in the high  
166 molecular weight, Endo-H-resistant species of IFN $\gamma$ -R1. This suggests that the  
167 regulation of IFN $\gamma$ -R1 by STUB1 occurs after it passes through the endoplasmic  
168 reticulum (**Supplementary Fig. 2b, c**).

169

170 IFN $\gamma$ -R1 manifested as multiple protein species that were distinguishable by SDS-  
171 PAGE analysis (**Supplementary Fig. 2b**). To determine which of these forms are  
172 located at the tumor cell surface, we performed biotin labeling and  
173 immunoprecipitation of cell-surface proteins<sup>31</sup>. This analysis showed that solely the  
174 high molecular weight, Endo-H-resistant, species of IFN $\gamma$ -R1 resides at the plasma  
175 membrane (**Supplementary Fig. 2d**). This result implies that STUB1 specifically  
176 regulates the cell surface fraction of IFN $\gamma$ -R1, which is in accordance with our flow  
177 cytometry findings.

178

179 **STUB1 destabilizes IFN $\gamma$ -R1 in JAK1-dependent and JAK1-independent**  
180 **manners**

181 STUB1, initially identified as a co-chaperone<sup>32</sup>, acts as an E3 ubiquitin ligase<sup>33,34</sup> that  
182 affects protein stability by mediating proteasomal degradation<sup>34–36</sup>. Therefore, and in  
183 accordance with our observation that STUB1 loss does not affect *IFNGR1* mRNA  
184 levels, we hypothesized that it destabilizes the IFN $\gamma$ -R1 protein. To test this, we  
185 profiled the proteomes of cells expressing either a non-targeting control sgRNA  
186 (sgCtrl) or a *STUB1*-targeting sgRNA (sg*STUB1*) by mass spectrometry. This analysis  
187 not only confirmed our observation that *STUB1* inactivation increases IFN $\gamma$ -R1 levels,  
188 but it also revealed a marked increase in the abundance of the JAK1 protein (**Fig. 2c**).  
189 This finding was confirmed by the same analysis in a second cell line (**Supplementary**

190 **Fig. 2e**). It was also validated by immunoblotting for IFN $\gamma$ -R1 and JAK1, in two  
191 melanoma cell lines (**Fig. 2d, Supplementary Fig. 2f and g**). Similar to its regulation  
192 of IFN $\gamma$ -R1 expression, STUB1 also affected JAK1 protein stability, as *JAK1* transcript  
193 levels remained unchanged by *STUB1* inactivation (**Supplementary Fig. 2h**).

194

195 While it is known that the interaction of IFN $\gamma$ -R1 and JAK1 is essential for the signaling  
196 functionality of the IFN $\gamma$  receptor complex<sup>37,38</sup>, a potential role of JAK1 in stabilizing  
197 IFN $\gamma$ -R1 levels, and by extension the IFN $\gamma$  receptor complex, has not been reported.  
198 We first investigated whether heightened JAK1 expression would suffice to drive  
199 increased IFN $\gamma$ -R1 protein stability. Ectopically expressed *JAK1* strongly increased  
200 IFN $\gamma$ -R1 protein abundance (**Fig. 2e**), which translated into increased cell surface  
201 expression (**Fig. 2f**), even more so than ectopically expressed *IFNGR1* (**Fig. 2e-g and**  
202 **Supplementary Fig. 2i and j**). This result suggests not only that elevated JAK1  
203 protein levels are sufficient to stabilize IFN $\gamma$ -R1 protein, but also that *JAK1* expression  
204 may be crucial in dictating the amount of IFN $\gamma$ -R1 present on the cell surface;  
205 unexpectedly even more so than *IFNGR1* expression itself.

206

207 To determine whether elevated JAK1 levels in *STUB1*-inactivated cells account for the  
208 rise in IFN $\gamma$ -R1 abundance, we inactivated JAK1 in a *STUB1*-deficient background  
209 (**Fig. 2h and i**). This epistasis experiment revealed that *STUB1* inactivation still led to  
210 an increase in IFN $\gamma$ -R1, albeit to a lesser degree than in the presence of JAK1 (**Fig.**  
211 **2h and i**). These findings together indicate that *STUB1* deficiency promotes IFN $\gamma$ -R1  
212 stabilization both in JAK1-dependent and -independent fashions: STUB1 depletion  
213 increases IFN $\gamma$ -R1 levels directly, but also increases JAK1 abundance, which in turn  
214 further stabilizes IFN $\gamma$ -R1.

215

### 216 **STUB1 drives proteasomal degradation of IFN $\gamma$ receptor complex through IFN $\gamma$ -** 217 **R1<sup>K285</sup> and JAK1<sup>K249</sup> residues**

218 Since STUB1 has been shown to mediate proteasomal degradation of client  
219 proteins<sup>35,36</sup>, we next asked whether increased protein levels of IFN $\gamma$ -R1 and JAK1  
220 upon STUB1 inactivation were caused by reduced proteasomal degradation. We  
221 treated either wildtype or *STUB1*-deficient cells with MG132, an inhibitor of  
222 proteasomal degradation. Western blot analysis of these cell lysates showed a  
223 significant induction of IFN $\gamma$ -R1 proteins in wildtype cells upon treatment with MG132



224 **(Fig. 3a-c)**. In contrast, whereas baseline levels of IFN $\gamma$ -R1 were already increased in  
225 *STUB1*-deficient cells, there was no further induction upon MG132 treatment. A similar  
226 observation was made for JAK1 **(Fig. 3a-c)**. These results were recapitulated in an  
227 additional cell line **(Supplementary Fig. 3a-c)**.

228

229 Proteasomal degradation by STUB1 requires its tetracorticopeptide (TPR) domain,  
230 which interacts with chaperones such as HSC70<sup>34-36</sup>. Therefore, we queried whether  
231 this domain is required to destabilize IFN $\gamma$ -R1 and JAK1 protein levels. Reconstitution  
232 of full length STUB1 in *STUB1*-deficient cells resulted in reduction of IFN $\gamma$ -R1 and  
233 JAK1 proteins to similar baseline levels as observed in wildtype cells **(Fig. 3d,**  
234 **Supplementary Fig. 3d and e)**. However, *STUB1*-deficient cells reconstituted with a  
235 TPR-domain-deficient isoform retained elevated levels of IFN $\gamma$ -R1 and JAK1  
236 comparable to those seen in *STUB1*-deficient cells **(Fig. 3d, Supplementary Fig. 3d**  
237 **and e)**. Taken together, these results indicate that STUB1 regulates protein turnover  
238 of both IFN $\gamma$ -R1 and JAK1 by enabling proteasomal degradation of the latter proteins.

239

240 To understand in more detail how STUB1 mediates the proteasomal degradation of  
241 both factors, particularly which lysine residues are critical targets of STUB1, we  
242 queried the changes in the landscape of ubiquitinated proteins upon STUB1 depletion.  
243 We immunopurified peptides containing a lysine (K)-epsilon-diglycine motif; a remnant  
244 mark of ubiquitinated proteins after trypsin digestion<sup>39</sup>, from both wildtype and *STUB1*-  
245 inactivated cells. Then, by mass spectrometry, we identified differentially ubiquitinated  
246 lysine residues between the two genotypes. From this analysis, we learned that IFN $\gamma$ -  
247 R1<sup>K285</sup> and JAK1<sup>K249</sup> were more frequently ubiquitinated in *STUB1*-deficient cells **(Fig.**  
248 **3e)**.

249

250 This raises the possibility that STUB1 specifically recognizes these ubiquitinated  
251 residues and uses them as substrates for subsequent proteasomal degradation of  
252 their respective proteins. To validate this hypothesis, we generated melanoma cell  
253 clones deficient in both *IFNGR1* and *JAK1* (*IFNGR1*-KO + *JAK1*-KO) in either a  
254 wildtype or *STUB1*-deficient background. We then reconstituted *JAK1* and *IFNGR1*  
255 either in a wildtype configuration, or in a form in which the STUB1-targeted lysine  
256 residues were mutated to arginine, thereby precluding ubiquitination events from  
257 occurring at those sites. We assessed the effects of the various mutations and

258 genotypes on IFN $\gamma$ -R1 and JAK1 protein levels by flow cytometry and Western blot  
259 (**Fig. 3f-k and Supplementary Fig. 3f-i**). This reconstitution experiment showed that  
260 preventing ubiquitination of IFN $\gamma$ -R1<sup>K285</sup> and JAK1<sup>K249</sup> resulted in marked protein  
261 stabilization of IFN $\gamma$ -R1 and JAK1 in wildtype cells (**Fig. 3g and Supplementary Fig.**  
262 **3f-i, sgCtrl samples**). This increased protein stability of mutant IFN $\gamma$ -R1<sup>K285</sup> and  
263 JAK1<sup>K249</sup> likely occurs through reduced proteasomal turnover, as MG132 treatment  
264 was unable to further stabilize IFN $\gamma$ -R1 and JAK1 levels in the IFN $\gamma$ -R1<sup>K285</sup> and  
265 JAK1<sup>K249</sup> mutants, whereas it did in wildtype cells (**Fig. 3g-i**).

266

267 To assess the reliance of STUB1 on these residues for modifying IFN $\gamma$ -R1 and JAK1  
268 stability, we continued by inactivating STUB1 in the IFN $\gamma$ -R1<sup>K285</sup> and JAK1<sup>K249</sup> mutant  
269 cells. We analyzed IFN $\gamma$ -R1 and JAK1 expression by Western blot (**Fig. 3j and**  
270 **Supplementary Fig. 3f-h**) and additionally assessed IFN $\gamma$ -R1 expression by flow  
271 cytometry (**Fig. 3k and Supplementary Fig. 3i**). Whereas in STUB1-proficient cells,  
272 the IFN $\gamma$ -R1<sup>K285</sup> and JAK1<sup>K249</sup> mutants resulted in increased stability of IFN $\gamma$ -R1 and  
273 JAK1 (**Fig. 3j, k and Supplementary Fig. 3f-i**), they were unable to further increase  
274 IFN $\gamma$ -R1 and JAK1 in a *STUB1*-KO background (**Fig. 3j, k and Supplementary Fig.**  
275 **3g and h**). This finding suggests that STUB1 recognizes and requires the ubiquitinated  
276 residues IFN $\gamma$ -R1<sup>K285</sup> and JAK1<sup>K249</sup> to target their parent proteins, IFN $\gamma$ -R1 and JAK1,  
277 for proteasomal degradation (**Fig. 3l**).

278

### 279 ***STUB1* inactivation sensitizes melanoma cells to cytotoxic T cells through** 280 **amplified IFN $\gamma$ signaling**

281 Having established that STUB1 regulates IFN $\gamma$ -R1 and JAK1 expression under  
282 homeostatic conditions, we next asked whether this regulation affects receptor  
283 complex stability during active IFN $\gamma$  signaling. Whereas wildtype tumor cells  
284 moderately upregulated IFN $\gamma$ -R1 expression upon treatment with increasing amounts  
285 of IFN $\gamma$ , *STUB1*-deficient cells further elevated IFN $\gamma$ -R1 protein levels, particularly the  
286 heavier, cell-surface isoforms (**Fig. 4a**). We also observed this altered IFN $\gamma$  response  
287 in *STUB1*-deficient cells with downstream mediators of IFN $\gamma$  signaling, as illustrated  
288 by an accelerated and robust onset of STAT1 phosphorylation upon IFN $\gamma$  treatment in  
289 *STUB1*-depleted cells (**Fig. 4b**). This altered signaling translated into enhanced  
290 transcription of IFN $\gamma$ -responsive genes, such as *CD274* (encoding PD-L1; **Fig. 4c**)

291 and *IDO1* (**Supplementary Fig. 4a**). We confirmed this observation at the protein level  
292 (**Supplementary Fig. 4b and c**).

293

294 In light of these results, it was important to assess whether this hyperresponsiveness  
295 to IFN $\gamma$  would also alter how *STUB1*-deficient tumor cells respond to T cell attack. We  
296 therefore profiled transcriptomic changes in wildtype and *STUB1*-deficient melanoma  
297 cells after T cell attack (**Fig. 4d**). Gene set enrichment analysis (GSEA) revealed that  
298 *STUB1*-depleted melanoma cells exhibit an amplified IFN $\gamma$  response compared to  
299 wildtype cells (**Fig. 4e**), whereas, as a control for its specificity, genes within the TNF  
300 pathway did not show this enrichment (**Fig. 4e**). We additionally derived an  
301 experimental IFN $\gamma$  response gene set from IFN $\gamma$ -treated melanoma cells  
302 (**Supplementary Fig. 4d**). This gene set was significantly stronger induced in *STUB1*-  
303 deficient melanoma cells challenged with cytotoxic T cells than in its control  
304 counterpart (**Fig. 4f, g**). We confirmed this effect in a second cell line (**Supplementary**  
305 **Fig. 4e and f**). Additionally, this effect was specific to IFN $\gamma$ -signaling, as it did not occur  
306 for a TNF signaling-based gene set (**Fig. 4f, g; Supplementary Fig. 4e and f**).

307

308 Given these findings, and our previous results demonstrating that elevated IFN $\gamma$ -R1  
309 levels sensitize tumor cells to IFN $\gamma$  treatment and cytotoxic T cells, we next tested  
310 whether *STUB1* inactivation induces hypersensitivity to (T cell-derived-) IFN $\gamma$ . Indeed,  
311 at concentrations where wildtype melanoma cells were barely affected by IFN $\gamma$  or T  
312 cell attack, *STUB1*-deficient melanoma cells were eliminated efficiently (**Fig. 4h-k and**  
313 **Supplementary Fig. 4g-j**). We confirmed that the sensitization to T cell attack was  
314 IFN $\gamma$ -dependent, as both *STUB1*-deficient and wildtype cells were equally sensitive to  
315 T cell attack when lacking IFN $\gamma$ -R1 expression (**Fig. 4l, m, and Supplementary Fig.**  
316 **4k and I**). Collectively, these data show that the strong basal and dynamic induction  
317 of IFN $\gamma$ -R1 expression by *STUB1* inactivation results in intensified IFN $\gamma$  signaling and  
318 consequently, IFN $\gamma$ -dependent sensitization of melanoma cells to cytotoxic T cells *in*  
319 *vitro*.

320

321 ***STUB1* inactivation and anti-PD-1 treatment constitute a rational combination**  
322 **therapy approach**

323 Having observed an enhanced sensitivity of *STUB1*-deficient melanoma cells to  
324 cytotoxic T cell pressure *in vitro* (**Fig. 4**), we next investigated whether this is

325 recapitulated cross-species and *in vivo*. We first established *Stub1*-deficient murine  
326 melanoma cell lines in which we could reiterate our findings from human cell lines *in*  
327 *vitro* (**Supplementary Fig. 5a-e**). Importantly and in line with our *in vitro* data, we  
328 validated that immunogenic B16F10-dOVA tumors lacking *Stub1* induced PD-L1 to a  
329 greater extent than wildtype tumors *in vivo* (**Fig. 5a-c**).

330

331 This provided a rationale to combine *Stub1* inactivation with anti-PD-1 treatment, as  
332 that combination would allow for intensified IFN $\gamma$  signaling while simultaneously  
333 preventing PD-L1-mediated immune evasion. To experimentally test this, we  
334 differentially labeled wildtype and *Stub1*-deficient B16F10-dOVA cells with either  
335 EGFP or mCherry, respectively. We then mixed these cell lines in a 1:1 ratio and  
336 transplanted them into immune-deficient NSG mice, or into immune-proficient  
337 C57BL/6 mice that were subsequently treated with either an isotype control antibody  
338 or an anti-PD-1 antibody. After 12 days, tumors were harvested and the ratio between  
339 wildtype and sg*Stub1* tumor cells was assessed by flow cytometry (**Fig. 5d-f**). This  
340 analysis indicated that while there was a trend towards higher sensitivity of *Stub1*-  
341 deficient tumors to immune attack (**Fig. 5e, f**, compare NSG vs.  $\alpha$ ISO), strong  
342 depletion of *Stub1*-deficient tumors was observed only upon treatment with anti-PD-1  
343 antibodies (**Fig. 5e, f**, compare NSG vs.  $\alpha$ PD-1 and  $\alpha$ ISO vs.  $\alpha$ PD-1). This finding  
344 illustrates the rationale for combining *STUB1* inhibition with anti-PD-1 therapy: it would  
345 allow for the increased susceptibility of tumors to T cell-derived IFN $\gamma$ , yet at the same  
346 time block the negative effects of increased IFN $\gamma$  signaling, namely increased PD-L1  
347 levels.

348

349 To substantiate the notion that *STUB1* inhibition and anti-PD-1 treatment constitute a  
350 rational treatment combination, we integrated our experimental data with clinical  
351 transcriptomic data. Based on the transcriptomic data we obtained from wildtype and  
352 *STUB1*-deficient melanoma cells after T cell attack (**Fig. 4d**), we established a *STUB1*-  
353 KO signature based on differentially upregulated genes in *STUB1*-deficient melanoma  
354 cells compared to wildtype cells upon T cell challenge (**Table 1**). We then applied this  
355 signature to transcriptomic data of melanoma patients undergoing different ICB  
356 therapies<sup>12,40</sup>. We found that a high *STUB1*-KO signature expression was associated  
357 with response to anti-PD-1 treatment in two cohorts (**Fig. 5g, h and Supplementary**  
358 **Fig. 5f, g**). Such correlation was not found for anti-CTLA-4 treatment (**Fig. 5i and j**).

359 Importantly, these associations were not biased by the limited presence of classical  
360 IFN $\gamma$  response genes in the *STUB1-KO* signature (**Supplementary Fig. 5h-j**).  
361 Collectively, these findings support the notion that STUB1 inactivation in combination  
362 with anti-PD-1 treatment represents a rational combinatorial treatment approach.  
363

## 364 Discussion

365 Although the importance of IFN $\gamma$  signaling in immunotherapy has become apparent in  
366 recent years, both experimental and preclinical studies have been largely focusing on  
367 perturbations in this pathway that contribute to tumor immunogenicity editing and  
368 immune escape<sup>4–6,25–27,41</sup>. Considerably less is known about the role and regulation of  
369 IFN $\gamma$ -R1 cell surface expression levels, particularly whether and how increased  
370 abundance sensitizes to (T cell-derived) IFN $\gamma$ . We show here that heightened IFN $\gamma$ -  
371 R1 expression levels on tumor cells increases the susceptibility to T cell-derived IFN $\gamma$   
372 and its antitumor activity. This observation is underscored by clinical data strongly  
373 linking transcriptional IFN $\gamma$ -dependent signaling in tumors to ICB therapy  
374 response<sup>11,17,24</sup>.

375  
376 The relationship between IFN $\gamma$ -R1 levels, IFN $\gamma$  signaling and immune sensitivity raises  
377 the possibility that induction of this pathway may trigger immune responsiveness of  
378 tumor cells, something that may be therapeutically explored. Because little is known  
379 about mechanisms governing IFN $\gamma$ -R1 cell surface expression, we performed an  
380 unbiased genome-wide screen and uncovered STUB1 as the most prominent hit: its  
381 loss led to increased IFN $\gamma$ -receptor complex cell surface expression. STUB1 acts by  
382 mediating proteasomal degradation of its core components, IFN $\gamma$ -R1 and its  
383 interaction partner JAK1. Our results suggest that STUB1 is a conserved E3 ubiquitin  
384 ligase for both IFN $\gamma$ -R1 and JAK1, extending a previous observation on the  
385 ubiquitination of IFN $\gamma$ -R1<sup>42</sup>. While STUB1 loss stabilizes cell surface IFN $\gamma$ -R1, it also  
386 increases the abundance of JAK1. We show that, in turn, the increased abundance of  
387 JAK1 has a stabilizing effect on IFN $\gamma$ -R1, because ectopic expression of JAK1 was  
388 sufficient to strongly stabilize IFN $\gamma$ -R1. This finding was rather unexpected, given that  
389 JAK1 is believed to function solely as a kinase downstream of IFN $\gamma$ -R1 following ligand  
390 engagement. Our results indicate that JAK1 in IFN $\gamma$  receptor signal transduction is  
391 more influential.

392  
393 Mechanistically, the identification of the critical ubiquitinated lysine residues, which  
394 STUB1 uses for ubiquitination of its IFN $\gamma$  receptor targets, IFN $\gamma$ -R1<sup>K285</sup> and JAK1<sup>K249</sup>,  
395 is of relevance to understand this mode of regulation. IFN $\gamma$ -R1<sup>K285</sup> is located in the box  
396 1 motif that is shared among cytokine class II receptors and is critical for JAK1  
397 binding<sup>43</sup>. Conversely, JAK1<sup>K249</sup> is located in the complementary FERM-domain of

398 JAK1, enabling the binding to the box1 motif of IFN $\gamma$ -R1<sup>43</sup>. These observations raise  
399 the possibility that JAK1 stabilizes IFN $\gamma$ -R1 by masking the critical IFN $\gamma$ -R1<sup>K285</sup> residue  
400 prone to ubiquitination and thereby prevents subsequent STUB1-mediated  
401 proteasomal degradation. As demonstrated above, this regulatory mechanism may  
402 become even more apparent when IFN $\gamma$  engages with its cognate receptor.  
403 Interestingly, this ubiquitination-mediated control of IFN $\gamma$  signaling at the level of IFN $\gamma$ -  
404 R1 may constitute a more common mechanism, as recently another ubiquitin ligase,  
405 FBXW7, was implicated in governing IFN $\gamma$ -R1 signaling in breast cancer<sup>44</sup>. Our  
406 findings are complementary to this study; together they not only uncover the  
407 importance of ubiquitin-mediated IFN $\gamma$ -R1 modulation but also highlight the  
408 unexpectedly broad consequences of this type of regulation, with strong effects in  
409 tumor cells ranging from heightened immune sensitivity to metastasis.

410

411 Our data suggest that as a result of IFN $\gamma$ -R1 stabilization, STUB1 loss leads to  
412 enhanced IFN $\gamma$  response as well as strong sensitization to cytotoxic T cell-mediated  
413 tumor cell killing. This suggests that the physiological role for STUB1 is to dampen  
414 IFN $\gamma$  responses. Our findings therefore explain several previous observations. First,  
415 *STUB1* inactivation was found to sensitize tumors to immune pressure in the context  
416 of GVAX and anti-PD-1 therapy<sup>26</sup>; however, the underlying mechanism of this  
417 observation was unknown. Second, in a previous genome-wide loss-of-function  
418 screen for IFN $\gamma$  signaling-independent tumor immune sensitizers, STUB1 was not  
419 identified as a hit<sup>19</sup>, highlighting its specific role as modulator of IFN $\gamma$  signaling. Third,  
420 STUB1 was identified as a regulator of IFN $\gamma$ -induced PD-L1 expression<sup>45</sup>. It was  
421 postulated that STUB1 directly mediates proteasomal degradation of PD-L1. However,  
422 we demonstrate that, instead, STUB1 acts as a modulator of IFN $\gamma$  signaling and thus  
423 indirectly modulates PD-L1 expression.

424

425 In clinical trials, PD-1 blockade is now being combined with a genuine plethora of  
426 secondary treatments, although the rationale is not always fully clear from the  
427 available experimental evidence<sup>46</sup>. We show that STUB1 loss leads to an enhanced  
428 IFN $\gamma$ -dependent transcriptional program. From a therapeutic point of view this could  
429 be beneficial, because several IFN $\gamma$  target genes, such as HLA, contribute to tumor  
430 eradication. However, also PD-L1 represents an established IFN $\gamma$  target, which we  
431 confirm here, and this constitutes an immune-protective tumor trait. Our observations,

432 therefore, provide a clear rationale for combining STUB1 perturbation with PD-1  
433 blockade. Indeed, we show that STUB1 deficiency in tumors synergizes with anti-PD-  
434 1 treatment in a murine model of melanoma. Collectively, our results therefore merit  
435 clinical exploration of inhibiting STUB1 in combination with PD-1 blockade, which will  
436 require the development of a pharmacologic inhibitor.  
437



## 438 **Materials and Methods**

### 439 *Cell lines used in the study*

440 The human D10 (female), SK-MEL-23 (female), SK-MEL147 (female), A375 (female),  
441 SK-MEL-28 (male), BLM-M (male), 451Lu (male), A101D (male), LCLC-103H (male),  
442 HCC-4006 (male), RKO (unspecified), 8505C (female) and HEK293T (female) cell  
443 lines were obtained from the internal Peeper laboratory stock, as was the murine  
444 B16F10-OVA (male) cell line. The murine D4M.3A (male) cell line was obtained from  
445 the Blank laboratory. All cell lines were tested monthly by PCR to be negative for  
446 mycoplasma infection.

447

### 448 *MART-1 T cell generation*

449 MART-1 retrovirus was made using a producer cell line as described previously<sup>47</sup>.  
450 Peripheral blood mononuclear cells (PBMCs) were isolated from healthy donor buffy  
451 coats (Sanquin, Amsterdam, the Netherlands) by density gradient centrifugation using  
452 Lymphoprep (Stem cell technologies, #07801). CD8 T cells were purified from the  
453 PBMC fraction using CD8 Dynabeads (Thermo Fisher Scientific, 11333D) according  
454 to manufacturer's instructions. The isolated CD8 T cells were activated for 48 hours  
455 on non-tissue culture-treated 24-well-plates, which had been coated with anti-CD3 and  
456 anti-CD28 activating antibodies overnight (eBioscience, 16-0037-85, 16-0289-85,  
457 each 5 µg per well) at a density of  $2 \times 10^6$  cells per well. After 48 hours  $2 \times 10^6$  cells were  
458 harvested and mixed with the MART-1 virus at a 1:1 ratio and plated on a non-tissue  
459 culture-treated 24-well-plate, which had been coated with Retronectin overnight  
460 (Takara Bio, TB T100B, 25 µg per well). Spinfection was performed for two hours at  
461 2000g. 24 hours following spinfection, MART-1 CD8 T cells were harvested and  
462 cultured for seven days, after which the transduction efficiency was assessed by flow  
463 cytometry using anti-mouse TCRβ (BD Bioscience, 553174). CD8 T cells were  
464 cultured in RPMI (Gibco, 11879020) containing 10% human serum (One Lamda,  
465 A25761), 100 units/ml penicillin, 100 µg per ml Streptomycin, 100 units/ml IL-2  
466 (Proleukin, Novartis), 10 ng/ml IL-7 (ImmunoTools, 11340077) and 10 ng/ml IL-15  
467 (ImmunoTools, 11340157). Following retroviral transduction, cells were maintained in  
468 RPMI containing 10% fetal bovine serum (Fisher Scientific, 15605639) and 100 units  
469 per ml IL-2.

470

471

472 *In vitro tumor competition assay*

473 IFN $\gamma$ -R1<sup>Low</sup> and IFN $\gamma$ -R1<sup>High</sup>-expressing tumor cells were labelled with CellTrace  
474 CFSE Cell Proliferation Dye (CFSE, Thermo Fisher Scientific, C34554) or CellTrace  
475 Violet Cell Proliferation Dye (CTV, Thermo Fisher Scientific, C34557) according to  
476 manufacturer's instructions. The labeled tumor cells were mixed in a 1:1 ratio and  
477  $4 \times 10^6$  cells were seeded per 10 cm dish (Greiner). The tumor cell mix was  
478 subsequently challenged three times for 24 hours with either MART-1 T cells or control  
479 T cells at a 1:8 ratio. In parallel, the tumor cell mix was treated with either 25 ng/ml  
480 IFN $\gamma$  or vehicle for five days. The surviving tumor cell fraction was analyzed for CFSE  
481 and CTV staining by flow cytometry 24 hours after the final T cell challenge or after  
482 five days of IFN $\gamma$  treatment.

483

484 *IFN $\gamma$ -induced PD-L1 and MHC class I expression*

485 Tumor cells were seeded in 24-well-plates at a density of  $3 \times 10^5$  cells per well and  
486 treated either with a serial dilution series of IFN $\gamma$  (PeproTech, 300-02) (starting at 50  
487 ng/ml in two-fold dilution steps) or vehicle for 24 hours. The cells were harvested after  
488 treatment and stained for PD-L1 (eBioscience, 12-5983-42) and MHC class I (R&D  
489 Systems, FAB7098G). Induction of the respective proteins was analyzed by flow  
490 cytometry.

491

492 *Lentiviral transductions*

493 HEK293T cells were co-transfected with pLX304 plasmids containing constructs of  
494 interest and the packaging plasmids pMD2.G (Addgene, #12259) and psPAX  
495 (Addgene, #12260) using polyethylenimine. 24 hours after transfection, the medium  
496 was replaced with OptiMEM (Thermo Fisher, 31985054) containing 2% fetal bovine  
497 serum. Another 24 hours later, lentivirus-containing supernatant was collected, filtered  
498 and stored at  $-80^\circ\text{C}$ . Tumor cells were lentivirally transduced by seeding  $5 \times 10^5$  cells  
499 per well in a 12-well plate (Greiner), adding lentivirus at a 1:1 ratio. After 24 hours the  
500 virus-containing medium was removed and transduced tumor cells were selected with  
501 antibiotics for at least seven days.

502

503 *Sort-based genome-wide CRISRP/Cas9 knockout screen*

504 D10 and SK-MEL-23 melanoma cells were first transduced to stably express Cas9  
505 (lentiCas9-Blast, Addgene, #52962) and selected with blasticidin (5  $\mu\text{g}/\text{ml}$ ) for at least

506 ten days. The respective cell lines were subsequently transduced with the human  
507 genome-wide CRISPR-KO (GeCKO, Addgene, #1000000048, #1000000049) sgRNA  
508 library at a 1000-fold representation and a multiplicity of infection of <0.3 to ensure  
509 one sgRNA integration per cell. The library transduction was performed in two  
510 replicates per cell line. Transduced cells were selected with puromycin (1µg/ml) for  
511 two days, after which library reference samples were harvested. Cells were cultured  
512 for an additional eight days to allow gene inactivation and establishment of the  
513 respective phenotype. Before sorting, a pre-sort bulk population was harvested.  
514 Library-transduced cells were then harvested and stained with anti-IFN $\gamma$ -R1/CD119-  
515 APC antibody (Miltenyi Biotec, 130-099-921) for FACSorting. From the live cell  
516 population 10% of cells with the highest and 10% of cells with the lowest IFN $\gamma$ -R1  
517 expression were sorted. The sorted cells were washed with PBS and the cell pellet  
518 was snap frozen. Genomic DNA was isolated using the Blood and Cell culture MAXI  
519 Kit (Qiagen, 13362), according to manufacturer's instructions. sgRNAs were amplified  
520 using a one-step barcoding PCR using NEBNext High Fidelity 2X PCR Master Mix  
521 (NEB, M0541L) and the following primers:

522 Forward primer:

523 5'-

524 AATGATACGGCGACCACCGAGATCTACACTCTTTCCCTACACGACGCTCTTCCG  
525 ATCTNNNNNGGCTTTATATATCTTGTGGAAAGGACGAAACACC-3'

526 Reverse Primer:

527 5'-CAAGCAGAAGACGGCATAACGAGATCCGACTCGGTGCCACTTTTTCAA-3'

528

529 The hexa-N nucleotide stretch contains a unique barcode to identify each sample  
530 following deep sequencing. MAGeCK (v0.5.6) was used to perform the analysis of the  
531 screen. To assess the depletion of core essential genes we compared the library  
532 reference sample to the pre-sorted bulk population. Putative regulators of IFN $\gamma$ -R1  
533 were identified by comparing the sgRNA abundance among the 10% highest and  
534 lowest IFN $\gamma$ -R1-expressing populations and a signed robust rank aggregation (RRA)  
535 score was assigned to the respective genes. sgRNA targets with a false discovery rate  
536 (FDR) <0.25 were considered as putative hits.

537

538

539

540 *qPCR-based detection of transcriptomic differences*

541 RNA from D10, SK-MEL-147 and SK-MEL-23 melanoma cells expressing either sgCtrl  
542 or sg*STUB1* was isolated using the Isolate II RNA Mini Kit (Bioline, BIO-52072)  
543 according to manufacturer's instructions. cDNA was reverse transcribed using the  
544 Maxima First Strand cDNA synthesis kit (Fisher Scientific, 15273796) according to  
545 manufacturer's instructions. cDNA samples were probed for the expression of *RPL13*,  
546 *IFNGR1*, *JAK1*, *CD274* and *IDO1* using the following primers:

547 *RPL13*:

548 Forward: 5'- GAGACAGTTCTGCTGAAGAACTGAA-3'

549 Reverse: 5'- TCCGGACGGGCATGAC-3'

550 *IFNGR1*:

551 Forward: 5'-CGGAAGTGACGTAAGGCCG-3'

552 Reverse: 5'-TTAGTTGGTGTAGGCACTGAGGA-3'

553 *JAK1*:

554 Forward: 5'- TACCACGAGGCCGGGAC-3'

555 Reverse: 5'- AGAAGCGTGTGTCTCAGAAGC-3'

556 *CD274*:

557 Forward: 5'- TGGCATTGCTGAACGCATTT-3'

558 Reverse: 5'- AGTGCAGCCAGGTCTAATTGTT-3'

559 *IDO1*:

560 Forward: 5'- AATCCACGATCATGTGAACCCA-3'

561 Reverse: 5'- GATAGCTGGGGGTTGCCTTT-3'

562

563 Gene Expression was quantified using the SensiFAST SYBR Hi-Rox Kit (Bioline,  
564 92090) in combination with the StepOnePlus Real-Time PCR System (Thermo  
565 Fisher). Gene expression was normalized to *RPL13* expression using the  $\Delta\Delta C_t$   
566 approach.

567

568 *T cell-melanoma cell co-culture*

569 Depending on the melanoma cell line,  $5 \times 10^4$  to  $1.2 \times 10^5$  cells were seeded per well in  
570 12-well plates in 0.5 ml DMEM containing 10% FBS. Melanoma cells were  
571 subsequently either co-cultured with the equivalent amount of control T cells or a serial  
572 dilution of MART-1 T cells in 0.5 ml DMEM containing 10% FBS (starting with a 1:1  
573 ratio and two-fold dilution steps). After 24 hours T cells were removed by washing the

574 plates with PBS, fresh culture medium was added and the melanoma cells were grown  
575 for four days. After the Ctrl T cell-treated well reached >80% confluence, the medium  
576 was removed and all wells were fixed with methanol and stained with crystal violet  
577 (0.1%) for 30 minutes.

578 B16F10-OVA cells were seeded at a density of  $5 \times 10^4$  cells per well in 0.5 ml DMEM  
579 containing 10% FBS in 12-well plates. OT-I T cells were then added in a two-fold serial  
580 dilution starting from 4:1 (T cell : melanoma cell) ratio in 0.5 ml DMEM containing 10%  
581 FBS. After 48 hours OT-I T cells were removed by washing the wells with PBS. The  
582 remaining melanoma cells were grown for an additional 48 hours, before being fixed  
583 with methanol and stained with crystal violet (0.1%). The crystal violet was removed  
584 and the plates were washed with water. After image acquisition, the crystal violet was  
585 suspended using a 10% acetic acid solution and the optical density of the resulting  
586 suspension was quantified.

587

#### 588 *Protein expression analysis by immunoblot*

589 Whole cell lysates were generated by removing culture medium and washing the  
590 adherent cells on the plate twice with PBS. The cells were then scraped, harvested in  
591 1 ml PBS and pelleted by centrifugation at 1000g. After removing PBS, the cell pellet  
592 was resuspended into the appropriate amount of RIPA lysis buffer (50mM TRIS pH  
593 8.0, 150mM NaCl, 1% Nonidet P40, 0.5% sodium deoxycholate, 0.1% SDS)  
594 supplemented with HALT Protease and Phosphatase inhibitor cocktail (Fisher  
595 Scientific, 78444). Lysis was performed on ice for 30 minutes. The samples were  
596 subsequently centrifuged at 17,000g and whole cell lysates were collected. The  
597 protein content of each lysate was quantified using Bio-Rad protein assay (Bio-Rad,  
598 500-0006). Protein concentrations were equalized and immunoblot samples were  
599 prepared through addition of 4xLDS sample buffer (Fisher Scientific, 15484379)  
600 containing 10%  $\beta$ -Mercaptoethanol (final concentration 2.5%) and subsequent  
601 incubation of the samples at 95°C for five minutes. Proteins in lysates were size-  
602 separated using 4-12% Bis-Tris polyacrylamide-SDS gels (Life Technologies) and  
603 nitrocellulose membranes (GE Healthcare). Blots were blocked using 4% Milk powder  
604 in 0.2% Tween-20 in PBS. Blocked membranes were incubated with primary  
605 antibodies overnight. Immunoblots were developed using Super Signal West Dura  
606 Extended Duration Substrate (Thermo Fisher, 34075). Luminescence signal was

607 captured by Amersham Hyperfilm high performance autoradiography film or by the  
608 Bio-Rad ChemiDoc imaging system. The following primary antibodies were used anti-  
609 IFN $\gamma$ -R1 (Santa Cruz Biotechnology, sc-28363), anti-JAK1 (D1T6W, Cell Signaling  
610 Technology, 50996), anti-STUB1/CHIP (C3B6, Cell Signaling Technology, 2080), anti-  
611 Tubulin (DM1A, Sigma Aldrich, T9026), anti-STAT1 (D1K9Y, Cell Signaling  
612 Technology, 12994), anti-STAT1-Tyr701 (58D6, Cell Signaling Technology, 9167),  
613 anti-mouse PD-L1 (MIH5, Thermo Fisher Scientific, 14-5982-81).

614

#### 615 *Quantification of protein expression of immunoblots*

616 Protein expression on immunoblots was quantified on 8-bit gray-scale-transformed .tiff  
617 images of either scanned Amersham Hyperfilm MP (GE Healthcare, 28906838) or .tiff  
618 images obtained by the Bio-Rad ChemiDoc imaging system. Fiji ImageJ was used to  
619 select a region of interest for the respective proteins. Protein expression for each  
620 protein was normalized to the loading control of the respective sample.

621

#### 622 *Biotin labeling of cell surface proteins*

623 Biotin labeling of cell surface proteins was performed according to the published  
624 protocol published by Huang<sup>31</sup>. In brief,  $2 \times 10^6$  D10 melanoma cells were seeded in 10  
625 cm culture dish 48 hours prior to the experiment. Cells were washed twice in ice-cold  
626 PBS/CaCl<sub>2</sub>/MgCl<sub>2</sub> (+2.5 mM CaCl<sub>2</sub>, 1 mM MgCl<sub>2</sub>, pH 7.4). Cell surface proteins were  
627 labeled with 2 ml of 0.5 mg/ml Sulfo-NHS-SS-biotin (in PBS/CaCl<sub>2</sub>/MgCl<sub>2</sub>) on ice for  
628 30 minutes. Labeling was quenched by washing cells three times with 3 ml of 50 mM  
629 glycine (in PBS/CaCl<sub>2</sub>/MgCl<sub>2</sub>). Cells were lysed using RIPA lysis buffer and  
630 biotinylated proteins were pulled down using Streptavidin-coated magnetic beads.  
631 Samples were size-separated using 4-12% Bis-Tris polyacrylamide-SDS gels (Life  
632 Technologies) and nitrocellulose membranes (GE Healthcare). And immunoblotted for  
633 IFN $\gamma$ -R1.

634

#### 635 *Proteome profiling*

636 sgCtrl- and sgSTUB1-expressing D10 and SK-MEL-147 melanoma cells (triplicates  
637 for both conditions) were lysed in 8M urea lysis buffer in the presence of cOmplete  
638 Mini protease inhibitor (Roche) and aliquots of 200  $\mu$ g protein were reduced, alkylated  
639 with chloroacetamide, predigested with Lys-C (Wako) (1:75, 4h at 37°C) and trypsin  
640 digested overnight (Trypsin Gold, Mass Spectrometry Grade, Promega; 1:50 at 37°C).

641 Peptide samples were desalted using C18 Sep-Pak cartridges (3cc, Waters) and  
642 eluted with acidic 40% and 80% acetonitrile. Dried D10 and SK-MEL-147 digests were  
643 reconstituted in 50mM HEPES buffer and replicates were labeled with 10-Plex TMT  
644 reagent (Thermo Fisher Scientific) according to the manufacturer's instructions.  
645 Labeled samples were mixed equally for both cell lines, desalted using Sep-Pak C18  
646 cartridges and fractionated by basic reversed-phase (HpH-RP) HPLC separation on a  
647 Phenomenex Gemini C18 analytical column (100 mm x 1 mm, particle size 3  $\mu$ m, 110  
648 Å pores) coupled to an Agilent 1260 HPLC system over a 60 minute gradient. Per cell  
649 line, fractions were concatenated to 12 fractions for proteome analysis.  
650 Peptide fractions were analyzed by nanoLC-MS/MS on a Thermo Orbitrap Fusion  
651 hybrid mass spectrometer (Q-OT-qIT, Thermo Scientific) equipped with an EASY-NLC  
652 1000 system (Thermo Scientific). Samples were directly loaded onto the analytical  
653 column (ReproSil-Pur 120 C18-AQ, 1.9 $\mu$ m, 75  $\mu$ m  $\times$  500 mm, packed in-house).  
654 Solvent A was 0.1% formic acid/water and solvent B was 0.1% formic acid/80%  
655 acetonitrile. Samples were eluted from the analytical column at a constant flow of 250  
656 nl/min in a four-hour gradient containing a 120-minute increase to 24% solvent B, a  
657 60-minute increase to 35% B, a 40-minute increase to 45% B, 20-minute increase to  
658 60% B and finishing with a 15-minute wash. MS settings were as follows: full MS scans  
659 (375-2000 m/z) were acquired at 120,000 resolution with an AGC target of  $4 \times 10^5$   
660 charges and maximum injection time of 50 ms. The mass spectrometer was run in top  
661 speed mode with 3s cycles and only precursors with charge state 2-7 were sampled  
662 for MS2 using 60,000 resolution, MS2 isolation window of 1 Th,  $5 \times 10^4$  AGC target, a  
663 maximum injection time of 60 ms, a fixed first mass of 110 m/z and a normalized  
664 collision energy of 33%. Raw data files were processed with Proteome Discoverer 2.2  
665 (Thermo Fisher Scientific) using a Sequest HT search against the Swissprot reviewed  
666 human database. Results were filtered using a 1% FDR cut-off at the protein and  
667 peptide level. TMT fragment ions were quantified using summed abundances with  
668 PSM filters requiring a S/N  $\geq 10$  and an isolation interference cutoff of 35%. Normalized  
669 protein and peptide abundances were extracted from PD2.2 and further analyzed  
670 using Perseus software (ver. 1.5.6.0)<sup>48</sup>. Differentially expressed proteins were  
671 determined using a t-test (cutoffs:  $p < 0.05$  and LFQ abundance difference  $< -0.2 \wedge >$   
672 0.2).  
673  
674

### 675 *Ubiquitination site profiling*

676 For ubiquitination site profiling, D10 melanoma cells expressing either a non-targeting  
677 control sgRNA (sgCtrl) or sgSTUB1 were lysed in 8M urea lysis buffer in the presence  
678 of cOmplete Mini protease inhibitor (Roche). Triplicates corresponding to 14 mg  
679 protein per sample for sgCtrl and sgSTUB1-expressing D10 cells were reduced,  
680 alkylated with chloroacetamide, predigested with Lys-C (Wako) (1:75, 4h at 37°C) and  
681 trypsin digested overnight (Trypsin Gold, Mass Spectrometry Grade, Promega; 1:50  
682 at 37°C). Peptide samples were desalted using C18 Sep-Pak cartridges (3cc, Waters)  
683 and eluted with acidic 40% and 80% acetonitrile. At this stage, aliquots corresponding  
684 to 200 µg protein digest were collected for proteome profiling, the remainder of the  
685 eluates being reserved for enrichment of ubiquitinated peptides. All peptide fractions  
686 were vacuum dried and stored at -80°C until further processing. Ubiquitinated peptides  
687 were enriched by immunoaffinity purification using the PTMScan Ubiquitin Remnant  
688 Motif (K-ε-GG) Kit (Cell Signaling Technology, 5562) according to the manufacturer's  
689 instructions. Ubiquitinated peptide samples were analyzed by nanoLC-MS/MS on an  
690 Orbitrap Fusion Tribrid mass spectrometer equipped with a Proxeon nLC1000 system  
691 (Thermo Scientific) using a non-linear 210 minute gradient as described previously<sup>49</sup>.  
692 Raw data files were processed with MaxQuant (ver. 1.5.6.0)<sup>50</sup>, searching against the  
693 human reviewed Uniprot database (release 2018\_01). False discovery rate was set to  
694 1% for both protein and peptide level and GG(K) was set as additional variable  
695 modification for analysis of ubiproteome samples. Ubiquitinated peptides were  
696 quantified with label-free quantitation (LFQ) using default settings. LFQ intensities  
697 were Log<sub>2</sub>-transformed in Perseus (ver. 1.5.6.0)<sup>48</sup>, after which ubiquitination sites were  
698 filtered for at least two valid values (out of 3 total) in at least one condition. Missing  
699 values were replaced by an imputation-based normal distribution using a width of 0.3  
700 and a downshift of 1.8. Differentially regulated ubiquitination sites were determined  
701 using a t-test (thresholds: p<0.05 and LFQ abundance difference < -1.0 ^ > 1.0).

702

### 703 *Proteasomal inhibitor treatment*

704 Melanoma cells were seeded and grown to 80% confluence and treated with either  
705 DMSO (vehicle) or with 10 µM MG132 (Medchem Express, HY-13259) for four hours.  
706 The medium was removed four hours later, cells were washed three times with PBS  
707 and whole cell lysates were prepared as described above.

708



709 *Animal studies*

710 All animal studies were approved by the animal ethics committee of the Netherlands  
711 Cancer Institute (NKI) and performed in accordance with ethical and procedural  
712 guidelines established by the NKI and Dutch legislation. Male mice, of either C57BL/6  
713 (Janvier) or NSG-B2m (The Jackson Laboratory) mouse strains were used at an age  
714 of 8-12 weeks.

715

716 *In vivo tumor competition assay*

717 B16F10-dOVA cells were lentivirally transduced with lenti-Cas9-blast to stably express  
718 Cas9 and selected with blasticidin (5 µg/ml) for at least ten days. The cells were then  
719 lentivirally transduced to stably express either sgCtrl or sg*Stub1* (lentiGuide-Puro,  
720 #52963) and cultured with puromycin (1 µg/ml) for at least ten days to allow for  
721 selection of cells with genetic inactivation of *Stub1*. Knockout efficiency was assessed  
722 by immunoblotting. sgCtrl-expressing cells were transduced to stably express EGFP  
723 (pLX304-EGFP-Blast) and sg*Stub1*-expressing cells were transduced to stably  
724 express mCherry (pLX304-mCherry-Blast). EGFP and mCherry-positive populations  
725 were sorted and cultured. Cells were mixed in a 1:1 ratio prior to injection and 5x10<sup>5</sup>  
726 cell per mouse were injected into immune-deficient NSG-β2m<sup>-/-</sup> (n=10, The Jackson  
727 Laboratory, 010636; RRID:ISMR\_JAX:010636), or C57BL/6J mice (n=20, Janvier,  
728 C57BL/6JRj). Tumor bearing C57BL/6J mice were treated with either 100 µg/mouse  
729 isotype control antibody (Leinco Technologies, R1367) or with 100 µg/mouse anti-  
730 mouse-Pd-1 (Leinco Technologies, P372) one and six days post tumor injection.  
731 Tumors were harvested at day 12 and dissociated into single cell suspensions. Cells  
732 were subsequently stained for immune cells using anti-CD45-APC (Miltenyi, 130-102-  
733 544) and the tumor composition was analyzed by flow cytometry.

734

735 *Transcriptomic profiling of melanoma cells after T cell attack*

736 2x10<sup>6</sup> D10 and SK-MEL-147 melanoma cells were plated per dish in 10 cm cell culture  
737 dishes 48 hours prior to T cell challenge. Melanoma cells were subsequently  
738 challenged with either Ctrl or MART-1 T cells for eight hours. The T cells were removed  
739 by washing the plates with PBS. The remaining tumor cells were harvested and lysed  
740 in RLT buffer (Qiagen, 79216) and sequenced on an Illumina HiSeq2500. Fastq files  
741 were mapped to the human reference genome (Homo.sapiens.GRCh38.v77) using  
742 Tophat v2.1<sup>51</sup> with default settings for single-end data. The samples were used to

743 generate read count data using itreecount ([github.com/NKI-GCF/itreecount](https://github.com/NKI-GCF/itreecount)).  
744 Normalization and statistical analysis of the expression of genes was performed using  
745 DESeq2 (V1.24.0)<sup>52</sup>. Centering of the normalized gene expression data was  
746 performed by subtracting the row means and scaling by dividing the columns by the  
747 standard deviation (SD) to generate a Z-score.  
748 Differentially expressed genes between *STUB1*-deficient and wildtype cells were  
749 calculated with DESeq2<sup>52</sup> using FDR<0.01. The significant genes that were up-  
750 regulated comprise the *STUB1*-KO signature (Table 1).

751

### 752 *External Datasets*

753 The anti-PD-1 treated melanoma patient samples were taken from Riaz *et al.*<sup>12</sup>  
754 (ENA/SRA database: PRJNA356761). Fastq files were downloaded and mapped to  
755 the human reference genome (Homo.sapiens.GRCh38.v82) using STAR(2.6.0c)<sup>53</sup> in  
756 2-pass mode with default settings for paired-end data. The samples were used to  
757 generate read count data using HTSeq-count<sup>54</sup>. Normalization and statistical analysis  
758 of the expression of genes was performed using DESeq2<sup>52</sup>. Centering of the  
759 normalized gene expression data was performed by subtracting the row means and  
760 scaling by dividing the columns by the standard deviation (SD) to generate a Z-score.  
761 Clinical data were taken from the supplementary table from the original paper.  
762 Response to ICB was based on RECIST criteria as described in the paper  
763 (Responders: CR/PR/SD, Non-Responders: PD).

764 Normalized gene expression data (Nanostring) and clinical data from patients treated  
765 with anti-CTLA-4 or anti-PD1 were taken from the supplementary data from Roh *et al.*<sup>40</sup>.  
766 Response to ICB was based on the classification from the Roh *et al.* manuscript  
767 (Responder or non-responder).

768 Heat maps were generated with matching genes between the *STUB1*-KO signature  
769 and external datasets. Samples were ordered based on the average expression of the  
770 signature (average Z-score per sample).

771

### 772 *GSEA*

773 GSEAPreranked was performed using the BROAD javaGSEA standalone version  
774 (<http://www.broadinstitute.org/gsea/downloads.jsp>). Gene ranking was performed  
775 using the log<sub>2</sub>-fold change in gene expression between D10 and SK-MEL-147

776 melanoma cells expressing either sgCtrl or sg*STUB1* that were treated with MART-1  
777 T cells for eight hours. The pre-ranked gene list was run with 1000 permutations.

778

### 779 **Acknowledgements**

780 We thank all members of the Peeper and Blank laboratories as well as of the Division  
781 of Molecular Oncology and Immunology for constructive feedback and valuable input.  
782 We thank R. Mezzadra, C. Sun, T. Schumacher as well as J. Staring and T.  
783 Brummelkamp for sharing reagents and cell lines. Furthermore, we thank the flow  
784 cytometry, proteomics and sequencing core facilities as well as the animal housing  
785 facility of The Netherlands Cancer Institute for their support.

786

### 787 **Author contributions**

788 G.A., D.W.V. and D.S.P. conceptualized the project, G.A. and D.W.V. performed the  
789 experiments and contributed equally to this work. O.B.B. and M.A. performed the  
790 proteomic profiling experiments. O.K. performed bioinformatic analyses for  
791 transcriptomic profiling. M.A.L., B.B. and J.B. carried out mouse experiments. D.D.A.  
792 performed experiments. J.D.L. provided wildtype and mutant *IFNGR1*-ORF  
793 constructs. M.A. and O.B.B. acknowledge support of the X-omics Initiative, part of the  
794 NWO National Roadmap for Large-Scale Research Infrastructures. G.A., D.W.V. and  
795 D.S.P. wrote the manuscript. D.S.P. supervised this study.

796

### 797 **Competing Financial Interest Statement**

798 D.S.P. is co-founder, shareholder and advisor of Immagine B.V.

799 M.A.L. is co-founder, shareholder and C.E.O. of Immagine B.V.

800 The other authors report no competing financial interests.

801

802

803

## 804 References

- 805 1. Larkin, J. *et al.* Combined Nivolumab and Ipilimumab or Monotherapy in  
806 Untreated Melanoma. *N. Engl. J. Med.* **373**, 23–34 (2015).
- 807 2. Wolchok, J. D. *et al.* Overall Survival with Combined Nivolumab and  
808 Ipilimumab in Advanced Melanoma. *N. Engl. J. Med.* (2017)  
809 doi:10.1056/nejmoa1709684.
- 810 3. Restifo, N. P. *et al.* Loss of functional beta2-microglobulin in metastatic  
811 melanomas from five patients receiving immunotherapy. *J. Natl. Cancer Inst.*  
812 (1996) doi:10.1093/jnci/88.2.100.
- 813 4. Zaretsky, J. M. *et al.* Mutations Associated with Acquired Resistance to PD-1  
814 Blockade in Melanoma. *N. Engl. J. Med.* **375**, 819–29 (2016).
- 815 5. Gao, J. *et al.* Loss of IFN- $\gamma$  Pathway Genes in Tumor Cells as a Mechanism of  
816 Resistance to Anti-CTLA-4 Therapy. *Cell* **167**, 397-404.e9 (2016).
- 817 6. Kearney, C. J. *et al.* Tumor immune evasion arises through loss of TNF  
818 sensitivity. *Sci. Immunol.* (2018) doi:10.1126/sciimmunol.aar3451.
- 819 7. Sharma, P., Hu-Lieskovan, S., Wargo, J. A. & Ribas, A. Primary, Adaptive, and  
820 Acquired Resistance to Cancer Immunotherapy. *Cell* (2017)  
821 doi:10.1016/j.cell.2017.01.017.
- 822 8. Snyder, A. *et al.* Genetic basis for clinical response to CTLA-4 blockade in  
823 melanoma. *N. Engl. J. Med.* (2014) doi:10.1056/NEJMoa1406498.
- 824 9. Shukla, S. A. *et al.* Cancer-Germline Antigen Expression Discriminates Clinical  
825 Outcome to CTLA-4 Blockade. *Cell* (2018) doi:10.1016/j.cell.2018.03.026.
- 826 10. Rizvi, N. a. *et al.* Mutational landscape determines sensitivity to PD-1 blockade  
827 in non-small cell lung cancer. *Science (80-. ).* **348**, 124–8 (2015).
- 828 11. Van Allen, E. M. *et al.* Genomic correlates of response to CTLA-4 blockade in  
829 metastatic melanoma. *Science (80-. ).* (2015) doi:10.1126/science.aad0095.
- 830 12. Riaz, N. *et al.* Tumor and Microenvironment Evolution during Immunotherapy  
831 with Nivolumab. *Cell* (2017) doi:10.1016/j.cell.2017.09.028.
- 832 13. Topalian, S. L. *et al.* Safety, activity, and immune correlates of anti-PD-1  
833 antibody in cancer. *N. Engl. J. Med.* (2012) doi:10.1056/NEJMoa1200690.
- 834 14. Rosenberg, J. E. *et al.* Atezolizumab in patients with locally advanced and  
835 metastatic urothelial carcinoma who have progressed following treatment with  
836 platinum-based chemotherapy: A single-arm, multicentre, phase 2 trial. *Lancet*  
837 (2016) doi:10.1016/S0140-6736(16)00561-4.

- 838 15. Sade-Feldman, M. *et al.* Defining T Cell States Associated with Response to  
839 Checkpoint Immunotherapy in Melanoma. *Cell* (2018)  
840 doi:10.1016/j.cell.2018.10.038.
- 841 16. Tumeh, P. C. *et al.* PD-1 blockade induces responses by inhibiting adaptive  
842 immune resistance. *Nature* (2014) doi:10.1038/nature13954.
- 843 17. Ayers, M. *et al.* IFN- $\gamma$ -related mRNA profile predicts clinical response to PD-1  
844 blockade. *J. Clin. Invest.* (2017) doi:10.1172/JCI91190.
- 845 18. Shin, D. S. *et al.* Primary resistance to PD-1 blockade mediated by JAK1/2  
846 mutations. *Cancer Discov.* **7**, 188–201 (2017).
- 847 19. Vredevoogd, D. W. *et al.* Augmenting Immunotherapy Impact by Lowering  
848 Tumor TNF Cytotoxicity Threshold. *Cell* (2019) doi:10.1016/j.cell.2019.06.014.
- 849 20. Gooch, J. L., Herrera, R. E. & Yee, D. The role of p21 in interferon  $\gamma$ -mediated  
850 growth inhibition of human breast cancer cells. *Cell Growth Differ.* (2000).
- 851 21. Dai, C. & Krantz, S. B. Interferon  $\gamma$  induces upregulation and activation of  
852 caspases 1, 3, and 8 to produce apoptosis in human erythroid progenitor cells.  
853 *Blood* (1999).
- 854 22. Siegmund, D. *et al.* Death Receptor-Induced Signaling Pathways Are  
855 Differentially Regulated by Gamma Interferon Upstream of Caspase 8  
856 Processing. *Mol. Cell. Biol.* (2005) doi:10.1128/mcb.25.15.6363-6379.2005.
- 857 23. Fulda, S. & Debatin, K. M. IFN $\gamma$  sensitizes for apoptosis by upregulating  
858 caspase-8 expression through the Stat1 pathway. *Oncogene* (2002)  
859 doi:10.1038/sj.onc.1205255.
- 860 24. Liu, D. *et al.* Integrative molecular and clinical modeling of clinical outcomes to  
861 PD1 blockade in patients with metastatic melanoma. *Nat. Med.* **25**, (2019).
- 862 25. Kaplan, D. H. *et al.* Demonstration of an interferon  $\gamma$ -dependent tumor  
863 surveillance system in immunocompetent mice. *Proc. Natl. Acad. Sci. U. S. A.*  
864 (1998) doi:10.1073/pnas.95.13.7556.
- 865 26. Manguso, R. T. *et al.* In vivo CRISPR screening identifies Ptpn2 as a cancer  
866 immunotherapy target. *Nature* (2017) doi:10.1038/nature23270.
- 867 27. Pan, D. *et al.* A major chromatin regulator determines resistance of tumor cells  
868 to T cell-mediated killing. *Science* (80-. ). (2018) doi:10.1126/science.aao1710.
- 869 28. Shalem, O. *et al.* Genome-scale CRISPR-Cas9 knockout screening in human  
870 cells. *Science* **343**, 84–7 (2014).
- 871 29. Hart, T. *et al.* Evaluation and design of genome-wide CRISPR/SpCas9

- 872 knockout screens. *G3 Genes, Genomes, Genet.* **7**, 2719–2727 (2017).
- 873 30. Li, W. *et al.* MAGeCK enables robust identification of essential genes from  
874 genome-scale CRISPR/Cas9 knockout screens. *Genome Biol.* (2014)  
875 doi:10.1186/s13059-014-0554-4.
- 876 31. Huang, G. Biotinylation of Cell Surface Proteins. *BIO-PROTOCOL* (2012)  
877 doi:10.21769/bioprotoc.170.
- 878 32. Ballinger, C. A. *et al.* Identification of CHIP, a Novel Tetratricopeptide Repeat-  
879 Containing Protein That Interacts with Heat Shock Proteins and Negatively  
880 Regulates Chaperone Functions. *Mol. Cell. Biol.* (1999)  
881 doi:10.1128/mcb.19.6.4535.
- 882 33. Jiang, J. *et al.* CHIP is a U-box-dependent E3 ubiquitin ligase: Identification of  
883 Hsc70 as a target for ubiquitylation. *J. Biol. Chem.* (2001)  
884 doi:10.1074/jbc.M101968200.
- 885 34. Demand, J., Alberti, S., Patterson, C. & Höhfeld, J. Cooperation of a ubiquitin  
886 domain protein and an E3 ubiquitin ligase during chaperone/proteasome  
887 coupling. *Curr. Biol.* (2001) doi:10.1016/S0960-9822(01)00487-0.
- 888 35. Connell, P. *et al.* The co-chaperone CHIP regulates protein triage decisions  
889 mediated by heat-shock proteins. *Nat. Cell Biol.* (2001) doi:10.1038/35050618.
- 890 36. Meacham, G. C., Patterson, C., Zhang, W., Younger, J. M. & Cyr, D. M. The  
891 Hsc70 co-chaperone CHIP targets immature CFTR for proteasomal  
892 degradation. *Nat. Cell Biol.* (2001) doi:10.1038/35050509.
- 893 37. Kaplan, D. H., Greenlund, A. C., Tanner, J. W., Shaw, A. S. & Schreiber, R. D.  
894 Identification of an interferon- $\gamma$  receptor  $\alpha$  chain sequence required for JAK-1  
895 binding. *J. Biol. Chem.* (1996) doi:10.1074/jbc.271.1.9.
- 896 38. Usacheva, A., Kotenko, S., Witte, M. M. & Colamonici, O. R. Two Distinct  
897 Domains Within the N-Terminal Region of Janus Kinase 1 Interact with  
898 Cytokine Receptors. *J. Immunol.* (2002) doi:10.4049/jimmunol.169.3.1302.
- 899 39. van der Wal, L. *et al.* Improvement of ubiquitylation site detection by Orbitrap  
900 mass spectrometry. *J. Proteomics* (2018) doi:10.1016/j.jprot.2017.10.014.
- 901 40. Roh, W. *et al.* Integrated molecular analysis of tumor biopsies on sequential  
902 CTLA-4 and PD-1 blockade reveals markers of response and resistance. *Sci.*  
903 *Transl. Med.* (2017) doi:10.1126/scitranslmed.aah3560.
- 904 41. Dighe, A. S., Richards, E., Old, L. J. & Schreiber, R. D. Enhanced in vivo  
905 growth and resistance to rejection of tumor cells expressing dominant negative

- 906 IFN $\gamma$  receptors. *Immunity* (1994) doi:10.1016/1074-7613(94)90087-6.
- 907 42. Londino, J. D. *et al.* Post-translational modification of the interferon-gamma  
908 receptor alters its stability and signaling. *Biochem. J.* (2017)  
909 doi:10.1042/BCJ20170548.
- 910 43. Ferrao, R. *et al.* The Structural Basis for Class II Cytokine Receptor  
911 Recognition by JAK1. *Structure* (2016) doi:10.1016/j.str.2016.03.023.
- 912 44. Singh, S. *et al.* Loss of ELF5–FBXW7 stabilizes IFNGR1 to promote the  
913 growth and metastasis of triple-negative breast cancer through interferon- $\gamma$   
914 signalling. *Nat. Cell Biol.* (2020) doi:10.1038/s41556-020-0495-y.
- 915 45. Mezzadra, R. *et al.* Identification of CMTM6 and CMTM4 as PD-L1 protein  
916 regulators. *Nature* (2017) doi:10.1038/nature23669.
- 917 46. Boshuizen, J. & Peeper, D. S. Rational Cancer Treatment Combinations: An  
918 Urgent Clinical Need. *Molecular Cell* (2020) doi:10.1016/j.molcel.2020.05.031.
- 919 47. Gomez-Eerland, R. *et al.* Manufacture of gene-modified human T-cells with a  
920 memory stem/central memory phenotype. *Hum. Gene Ther. Methods* **25**, 277–  
921 87 (2014).
- 922 48. Tyanova, S. *et al.* The Perseus computational platform for comprehensive  
923 analysis of (prote)omics data. *Nature Methods* (2016)  
924 doi:10.1038/nmeth.3901.
- 925 49. Brockmann, M. *et al.* Genetic wiring maps of single-cell protein states reveal  
926 an off-switch for GPCR signalling. *Nature* (2017) doi:10.1038/nature22376.
- 927 50. Cox, J. *et al.* Accurate proteome-wide label-free quantification by delayed  
928 normalization and maximal peptide ratio extraction, termed MaxLFQ. *Mol. Cell.*  
929 *Proteomics* (2014) doi:10.1074/mcp.M113.031591.
- 930 51. Trapnell, C., Pachter, L. & Salzberg, S. L. TopHat: Discovering splice junctions  
931 with RNA-Seq. *Bioinformatics* (2009) doi:10.1093/bioinformatics/btp120.
- 932 52. Love, M. I., Huber, W. & Anders, S. Moderated estimation of fold change and  
933 dispersion for RNA-seq data with DESeq2. *Genome Biol.* (2014)  
934 doi:10.1186/s13059-014-0550-8.
- 935 53. Dobin, A. *et al.* STAR: Ultrafast universal RNA-seq aligner. *Bioinformatics*  
936 (2013) doi:10.1093/bioinformatics/bts635.
- 937 54. Anders, S., Pyl, P. T. & Huber, W. HTSeq-A Python framework to work with  
938 high-throughput sequencing data. *Bioinformatics* (2015)  
939 doi:10.1093/bioinformatics/btu638.

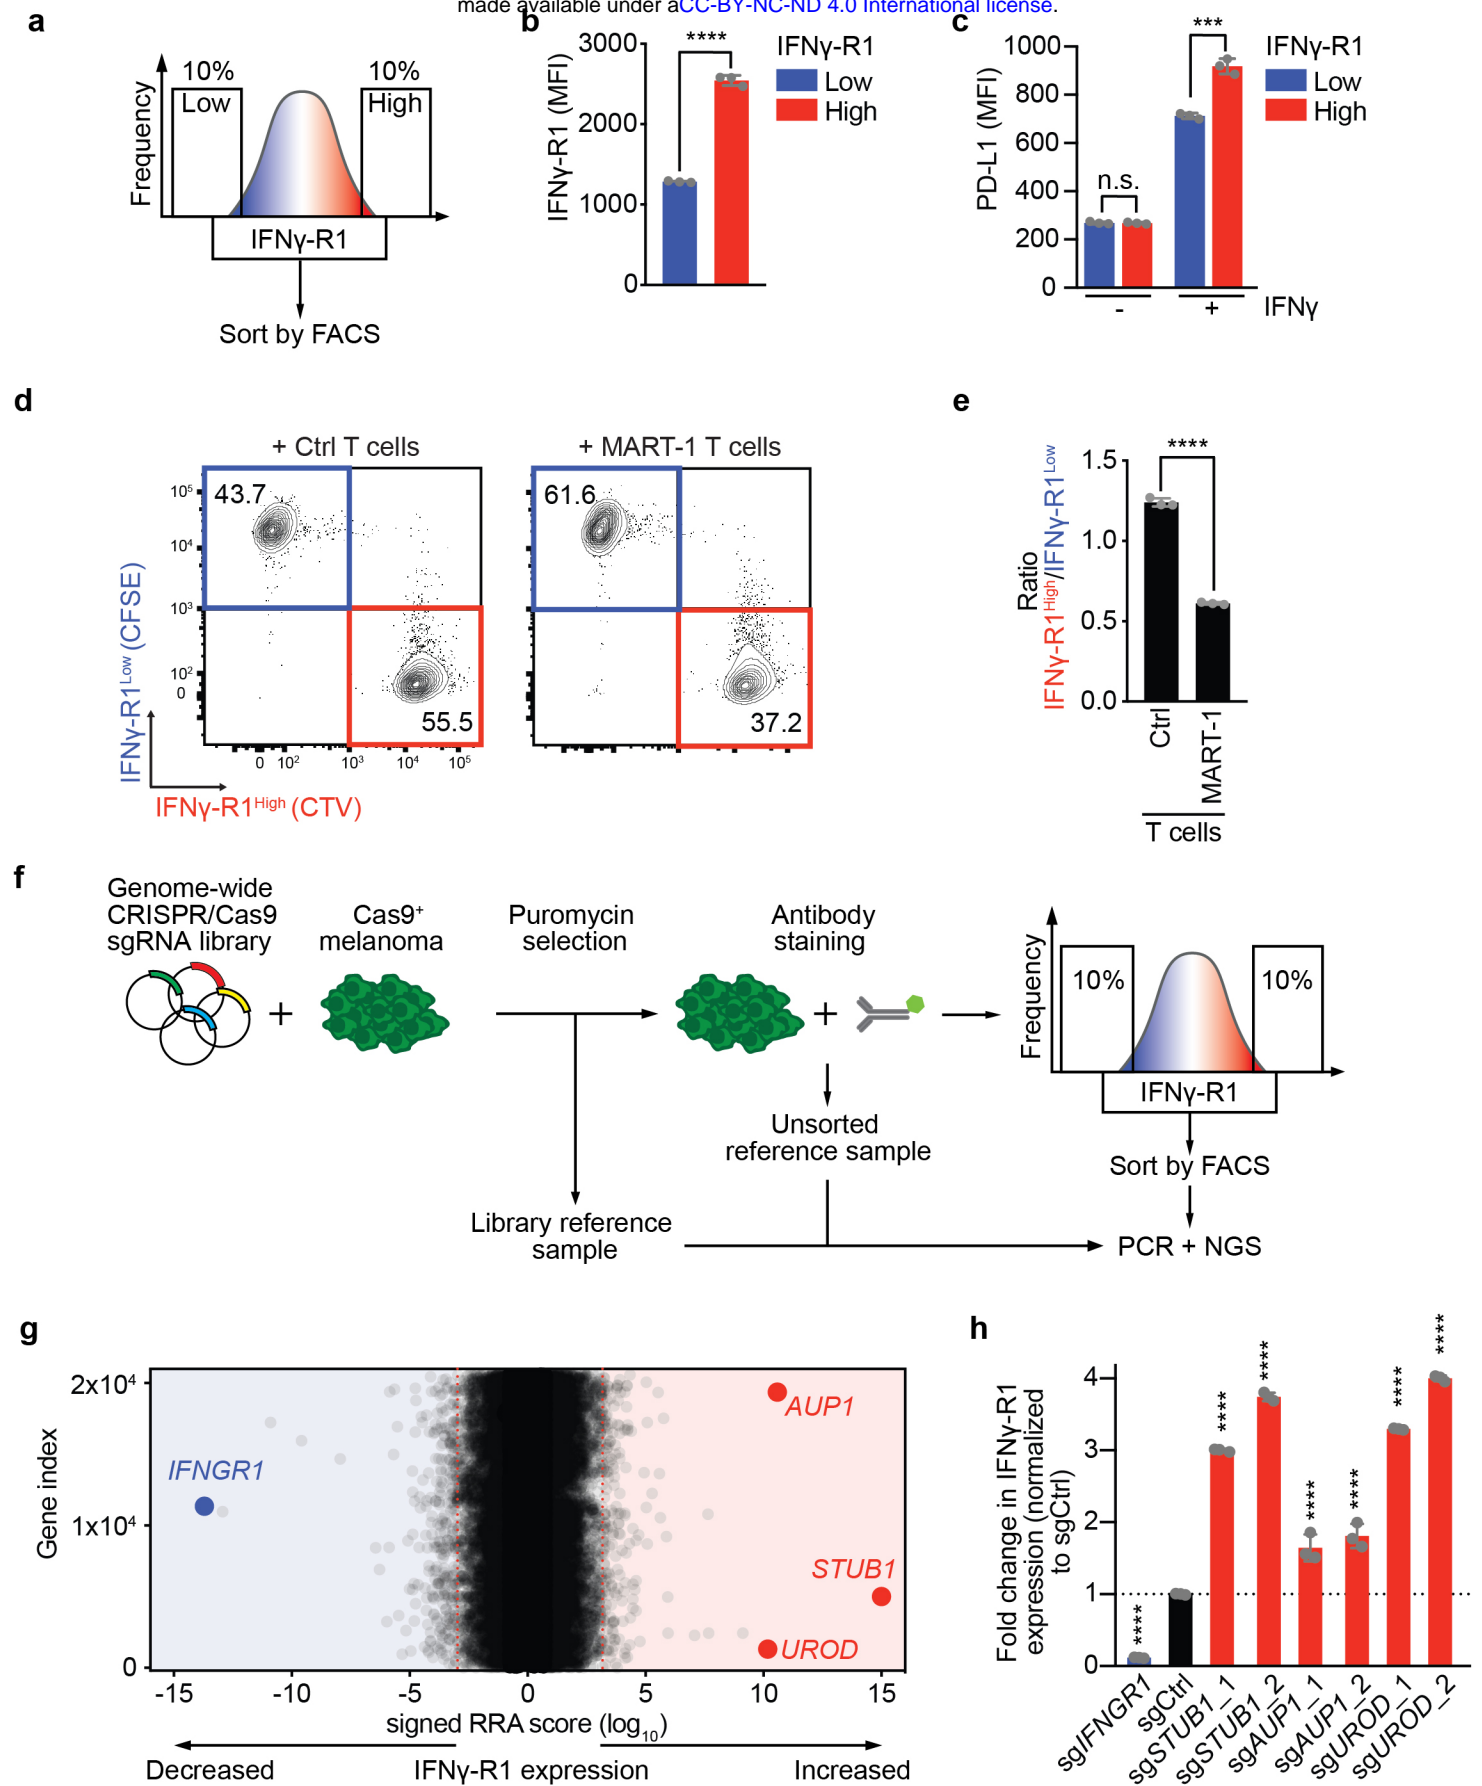



940 **Main Figure Legends**

941

942 **Figure 1: Genome-wide CRISPR/Cas9 knockout screen identifies negative**  
943 **regulators of IFN $\gamma$ -R1 expression to modulate its cell surface abundance.**

944 **a**, Schematic outline of the FACsorting strategy to establish IFN $\gamma$ -R1<sup>High</sup> and IFN $\gamma$ -  
945 R1<sup>Low</sup> D10 human melanoma cell populations.

946 **b**, Mean Fluorescence Intensity (MFI) of IFN $\gamma$ -R1 expression on D10 melanoma cells  
947 two days after sorting the cells by flow cytometry into IFN $\gamma$ -R1<sup>High</sup> and IFN $\gamma$ -R1<sup>Low</sup>  
948 subpopulations.

949 **c**, Assessment of IFN $\gamma$ -induced PD-L1 expression of IFN $\gamma$ -R1<sup>High</sup> and IFN $\gamma$ -R1<sup>Low</sup>-  
950 sorted cell populations 24 hours after treatment with 10 ng/ml IFN $\gamma$ .

951 **d**, Flow cytometry plot of the *in vitro* competition assay of IFN $\gamma$ -R1<sup>High</sup> vs. IFN $\gamma$ -R1<sup>Low</sup>  
952 cells co-cultured with either MART-1 or Ctrl T cells.

953 **e**, Quantification of the ratio IFN $\gamma$ -R1<sup>High</sup> : IFN $\gamma$ -R1<sup>Low</sup> in competition assay of **(d)**.

954 **f**, Schematic outline of the FACsort-based genome-wide CRISPR-KO screen to  
955 identify genes regulating IFN $\gamma$ -R1 cell surface expression.

956 **g**, Screen results; red dotted lines indicate FDR cutoff <0.25 for genes enriched in  
957 10% of cells with the highest (right) or lowest (left) IFN $\gamma$ -R1 expression, as calculated  
958 by MAGeCK analysis. Gene names indicate top enriched sgRNAs in cells with the  
959 10% highest IFN $\gamma$ -R1 expression (right), as well as the sgRNAs targeting *IFNGR1*  
960 (left), serving as a positive control.

961 **h**, Quantification of IFN $\gamma$ -R1 expression by flow cytometry on cells expressing the  
962 indicated sgRNAs, plotted as fold-change in IFN $\gamma$ -R1-MFI relative to sgCtrl-expressing  
963 cells.

964 Mean $\pm$ SD in **(b)**, \*\*\*\*p<0.0001, unpaired t-test for three biological replicates.

965 Mean $\pm$ SD in **(c)**, \*\*\*p=0.000467, n.s. p=0.806896, unpaired t-test for three biological  
966 replicates.

967 Mean $\pm$ SD in **(e)**: \*\*\*\*p<0.0001, unpaired t-test for three biological replicates.

968 Mean $\pm$ SD in **(h)**: \*\*\*\*p<0.0001, ordinary one-way ANOVA for three biological  
969 replicates with Dunnett post hoc testing.

970

971

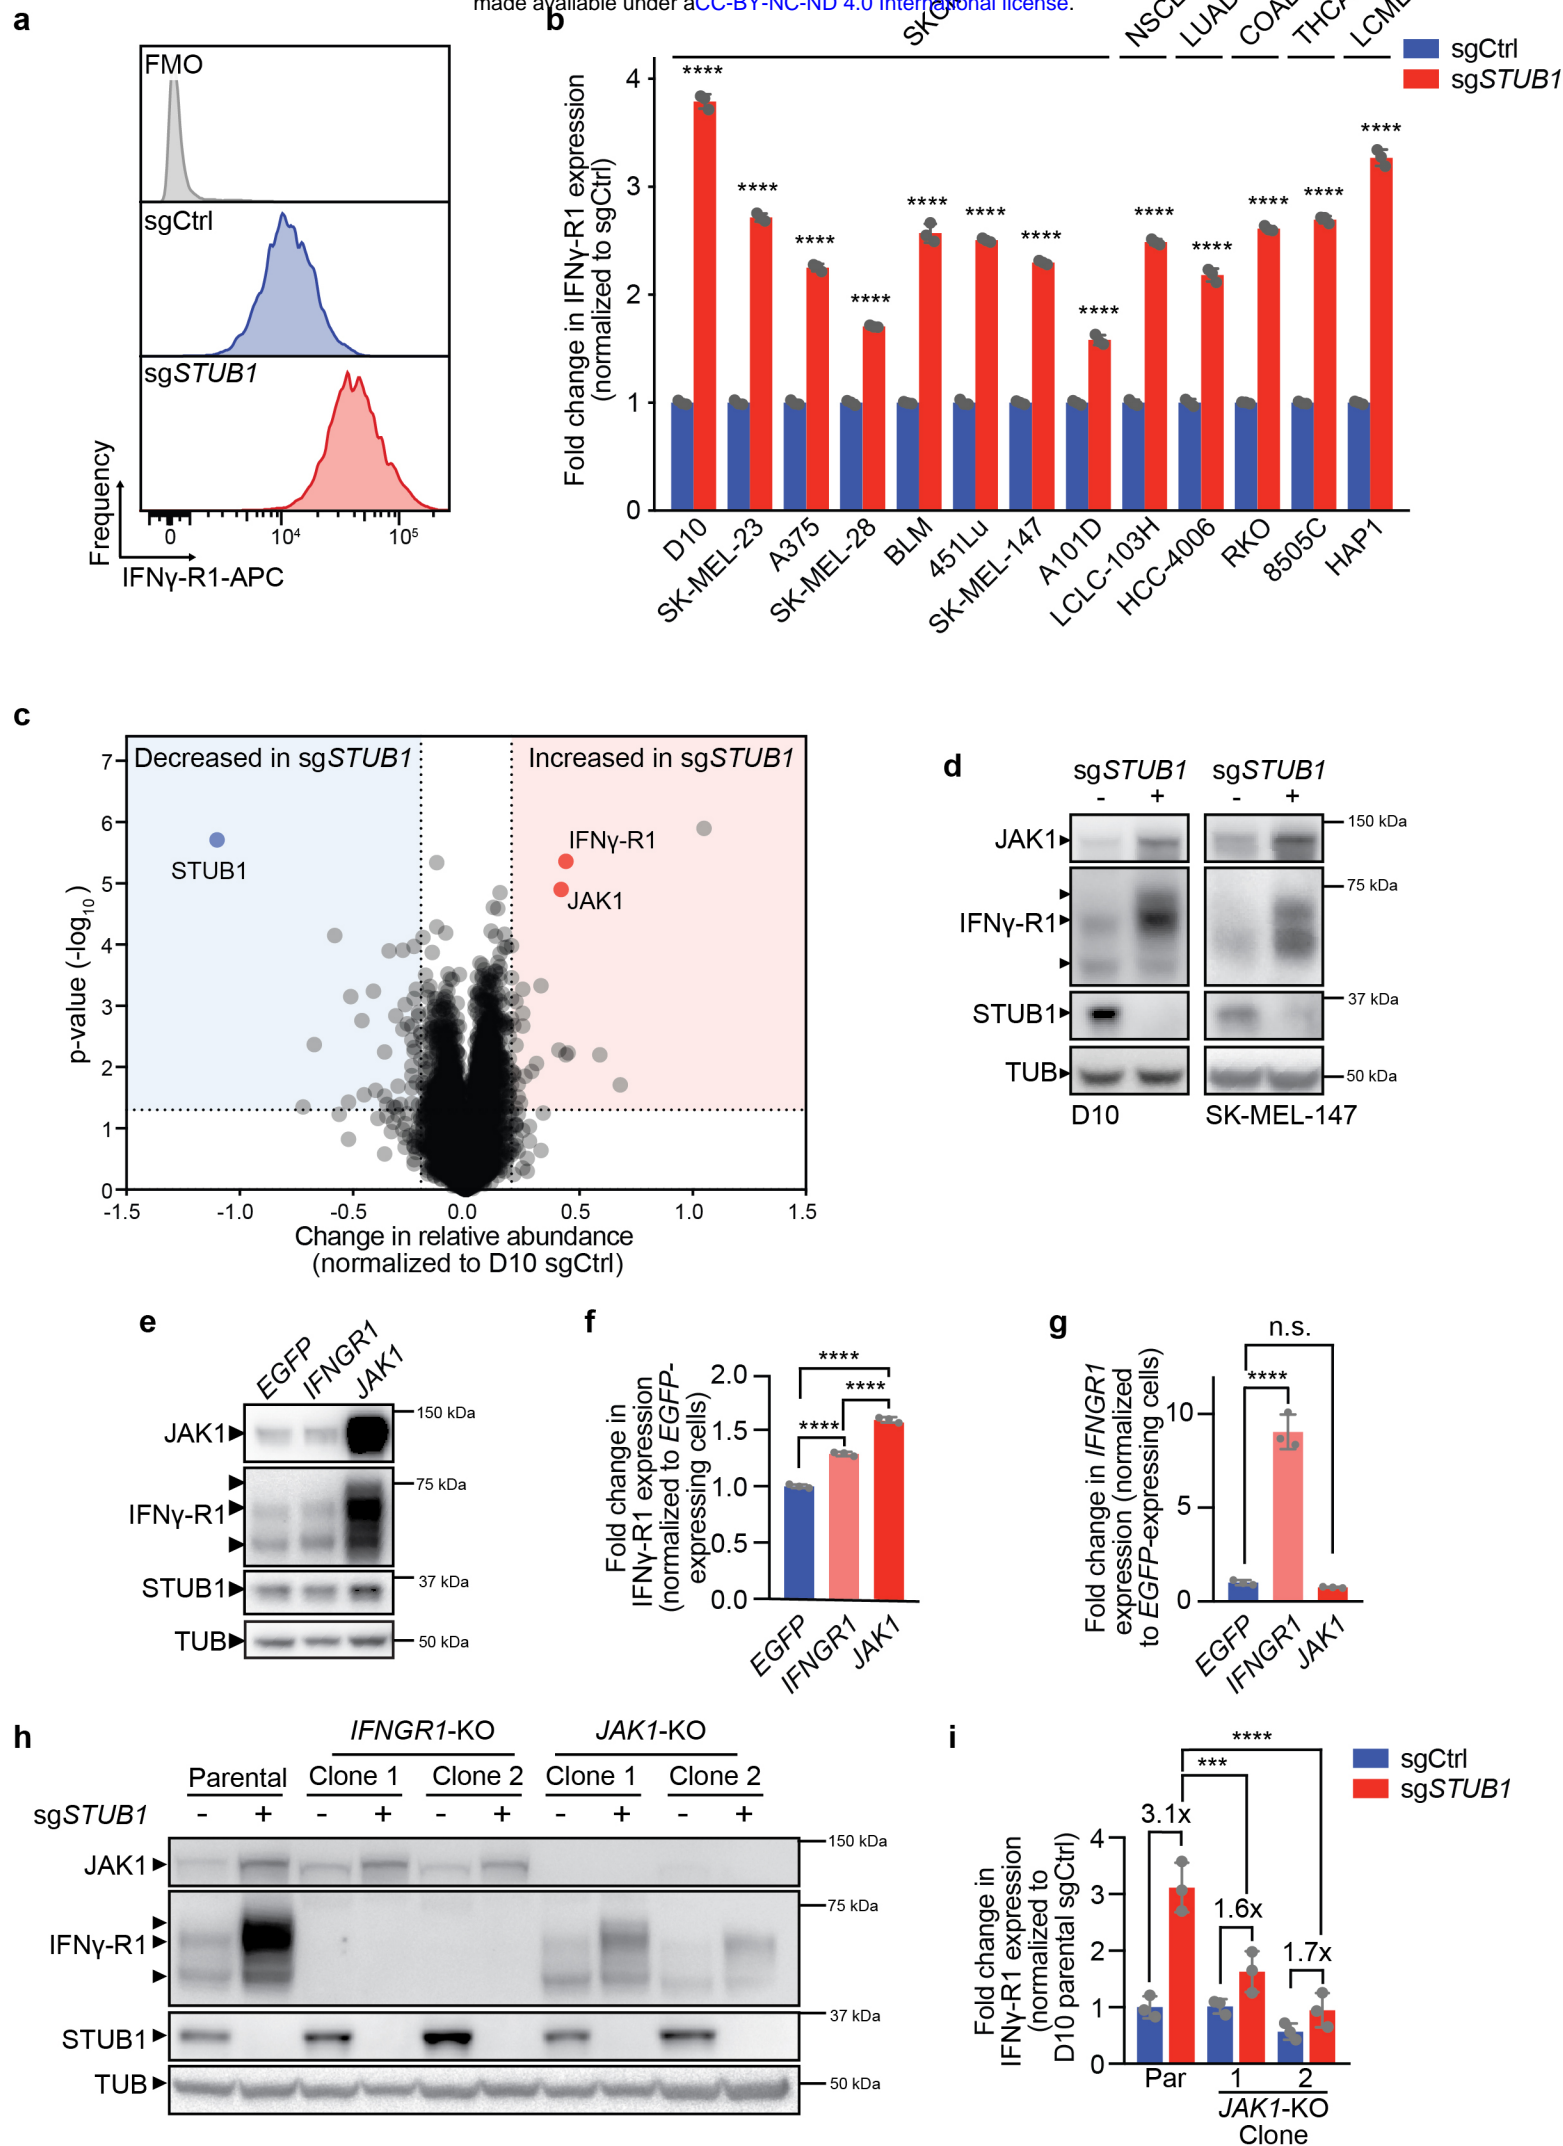

972 **Figure 2: STUB1 destabilizes cell surface IFN $\gamma$ -R1 in JAK1-dependent and JAK1-**  
973 **independent manners**

974 **a**, Histograms of IFN $\gamma$ -R1 expression on D10 melanoma cells as measured by flow  
975 cytometry in cells expressing the indicated sgRNAs. FMO: fluorescence minus one,  
976 APC: Allophycocyanin.

977 **b**, Relative IFN $\gamma$ -R1 expression (normalized to each respective sgCtrl) measured by  
978 flow cytometry in indicated human tumor cell lines expressing either sgCtrl or  
979 sgSTUB1. Cancer types of the cell lines are abbreviated as follows: SKCM, skin  
980 cutaneous melanoma; NSCLC, non-small-cell lung cancer; LUAD, lung  
981 adenocarcinoma; COAD, colon adenocarcinoma; THCA, thyroid carcinoma.

982 **c**, Results of proteomic profiling of D10 melanoma cells expressing either sgCtrl or  
983 sgSTUB1. Highlighted are the top differentially regulated proteins shared between  
984 sgCtrl and sgSTUB1-expressing D10 and SK-MEL-147 cells (**Supplementary Fig.**  
985 **4e**).

986 **d**, Immunoblot of D10 (left) and SK-MEL-147 (right) melanoma cells lines expressing  
987 either sgCtrl or sgSTUB1. Whole cell lysates were immunoblotted for the indicated  
988 proteins (TUB is tubulin).

989 **e**, Immunoblot of D10 melanoma cells ectopically expressing either *EGFP* (control),  
990 *IFNGR1* or *JAK1*. Whole cell lysates were immunoblotted for the indicated proteins  
991 (TUB is tubulin).

992 **f**, Quantification of IFN $\gamma$ -R1 expression (relative to that in *EGFP*-expressing cells) by  
993 flow cytometry in D10 melanoma cells ectopically expressing either *EGFP* (control),  
994 *IFNGR1* or *JAK1*.

995 **g**, Results of qPCR analysis for the mRNA expression of *IFNGR1* (relative to *RPL13*  
996 expression) in D10 cells expressing either *EGFP*, *IFNGR1* or *JAK1*. *IFNGR1*  
997 expression was normalized to that in *EGFP*-expressing cells.

998 **h**, Immunoblot of either parental D10 melanoma cells, D10 *IFNGR1*-KO clones or  
999 *JAK1*-KO clones expressing either sgCtrl or sgSTUB1. Whole cell lysates were blotted  
1000 for the indicated proteins (TUB is tubulin).

1001 **i**, Quantification of IFN $\gamma$ -R1 protein levels (relative to loading control and normalized  
1002 to D10 parental sgCtrl-expressing cells) from (i).

1003 Mean $\pm$ SD in (b), \*\*\*\*p<0.0001, multiple t-tests for three biological replicates,

1004 Mean $\pm$ SD in (f): \*\*\*\*p<0.0001, ordinary one-way ANOVA for three biological  
1005 replicates with Tukey post hoc testing.

1006 Mean $\pm$ SD in (g): n.s.  $p=0.8001$ , \*\*\*\* $p<0.0001$ , ordinary one-way ANOVA for three  
1007 biological replicates with Dunnett's post hoc testing.

1008 Mean $\pm$ SD in (i): \*\*\* $p=0.0004$ , \*\*\*\* $p<0.0001$ , ordinary one-way ANOVA for three  
1009 immunoblots with Tukey post hoc testing.

1010

1011

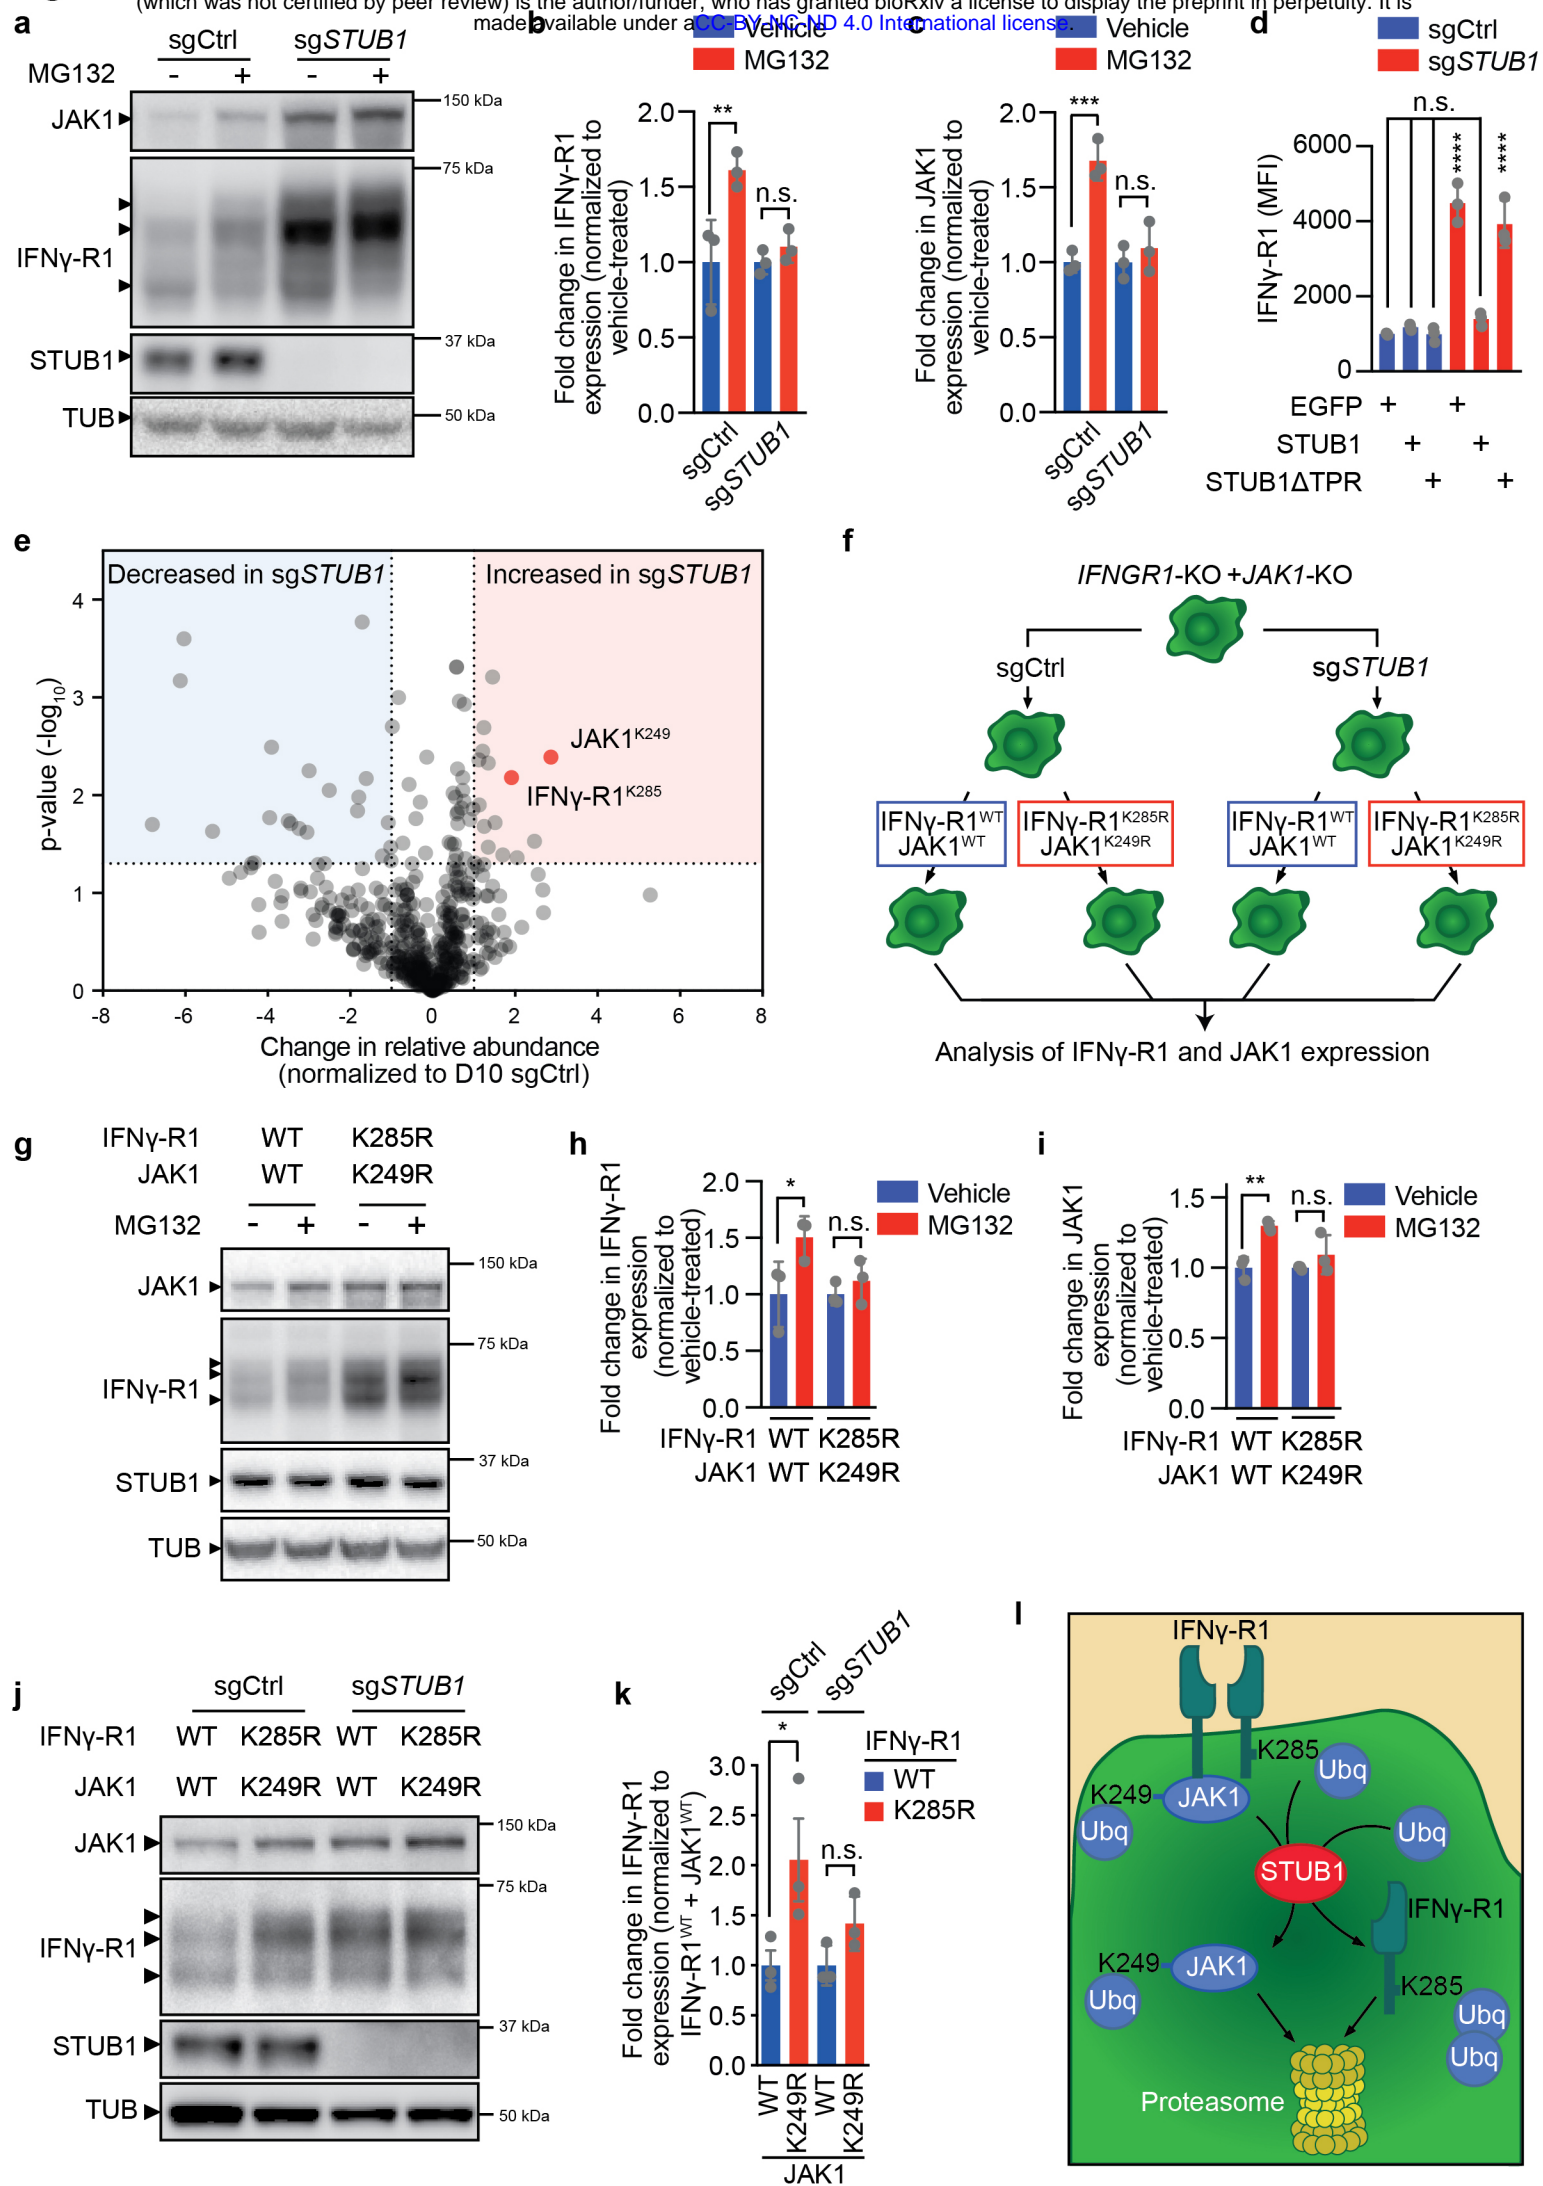

1012 **Figure 3: STUB1 drives proteasomal degradation of IFN $\gamma$  receptor complex**  
1013 **through IFN $\gamma$ -R1<sup>K285</sup> and JAK1<sup>K249</sup> residues.**

1014 **a**, Immunoblot of D10 melanoma cells expressing either sgCtrl or sgSTUB1 treated  
1015 with either vehicle or 10  $\mu$ M MG132 for four hours. Whole-cell lysates were  
1016 immunoblotted for the indicated proteins (TUB is tubulin).

1017 **b**, Quantification of IFN $\gamma$ -R1 protein levels (relative to loading control and normalized  
1018 to vehicle-treated group) from (a).

1019 **c**, Quantification of JAK1 protein levels (relative to loading control and normalized to  
1020 vehicle-treated group) from (a).

1021 **d**, MFI of IFN $\gamma$ -R1 expression on D10 cells expressing sgCtrl or sgSTUB1, which  
1022 ectopically express either 3xFLAG-tagged EGFP, full length STUB1 or STUB1 lacking  
1023 N-terminal residues 1-72 of the TPR domain.

1024 **e**, Relative change in K-epsilon-diglycine motif-containing peptides in sgSTUB1-  
1025 expressing cells, normalized to sgCtrl-expressing cells. Highlighted are peptides that  
1026 also exhibit significant differential regulation at total protein level as assessed by global  
1027 proteomic analysis (**Fig. 2c and Supplementary Figure 2e**)

1028 **f**, Schematic image depicting the reconstitution of either IFN $\gamma$ -R1<sup>WT</sup> and JAK1<sup>WT</sup> or  
1029 IFN $\gamma$ -R1<sup>K285R</sup> and JAK1<sup>K249R</sup> ORFs in *IFNGR1*-KO + *JAK1*-KO D10 melanoma clones  
1030 in either sgCtrl- or sgSTUB1-expressing genetic background.

1031 **g**, Immunoblot of *IFNGR1*-KO + *JAK1*-KO D10 melanoma clones, reconstituted with  
1032 either IFN $\gamma$ -R1<sup>WT</sup> and JAK1<sup>WT</sup> or IFN $\gamma$ -R1<sup>K285R</sup> and JAK1<sup>K249R</sup> ORFs. The cells were  
1033 subsequently treated with 10  $\mu$ M MG132 for four hours. Whole-cell lysates were  
1034 immunoblotted for the indicated proteins (TUB is tubulin).

1035 **h**, Quantification of IFN $\gamma$ -R1 protein levels (relative to loading control and normalized  
1036 to vehicle-treated group) from (g).

1037 **i**, Quantification of JAK1 protein levels (relative to loading control and normalized to  
1038 vehicle-treated group) from (g).

1039 **j**, Immunoblot on whole cell lysates of *IFNGR1*-KO + *JAK1*-KO D10 melanoma clones  
1040 reconstituted with the indicated *IFNGR1* and/or *JAK1* cDNAs, as outlined in (f). Whole  
1041 cell lysates were immunoblotted for the indicated proteins (TUB is tubulin).

1042 **k**, Fold change of IFN $\gamma$ -R1 MFI (relative to *IFNGR1*-WT+*JAK1*-WT-expressing cells)  
1043 in *IFNGR1*-KO + *JAK1*-KO D10 melanoma clones reconstituted with the indicated  
1044 *IFNGR1* and *JAK1* cDNAs, as outlined in (f). Bar chart represents an excerpt from

1045 **Supplementary Fig. 3i.**

1046 **I**, Model of STUB1-mediated proteasomal degradation of IFN $\gamma$ -R1 and JAK1.  
1047 Mean $\pm$ SD in **(b)**, \*\*p= 0.0085, n.s. p=0.8675, ordinary one-way ANOVA for three  
1048 biological replicates with Tukey post hoc testing.  
1049 Mean $\pm$ SD in **(c)**, \*\*\*p=0.0007, n.s. p=0.7936, ordinary one-way ANOVA for three  
1050 biological replicates with Tukey post hoc testing.  
1051 Mean $\pm$ SD in **(d)**, \*\*\*\*p<0.0001, n.s. p=0.7282, n.s. p=0.966, n.s. p=0.7154, ordinary  
1052 one-way ANOVA for three biological replicates with Tukey post hoc testing.  
1053 Mean $\pm$ SD in **(h)**, \*p=0.0322, n.s. p=0.7414, ordinary one-way ANOVA for three  
1054 biological replicates with Sidak post hoc testing.  
1055 Mean $\pm$ SD in **(i)**, \*\*p=0.0041, n.s. p=0.3570, ordinary one-way ANOVA for three  
1056 biological replicates with Sidak post hoc testing.  
1057 Mean $\pm$ SD in **(k)**, \*p=0.036, n.s. p=0.9812, ordinary one-way ANOVA for three  
1058 biological replicates with Tukey post hoc testing.  
1059

## Figure 4

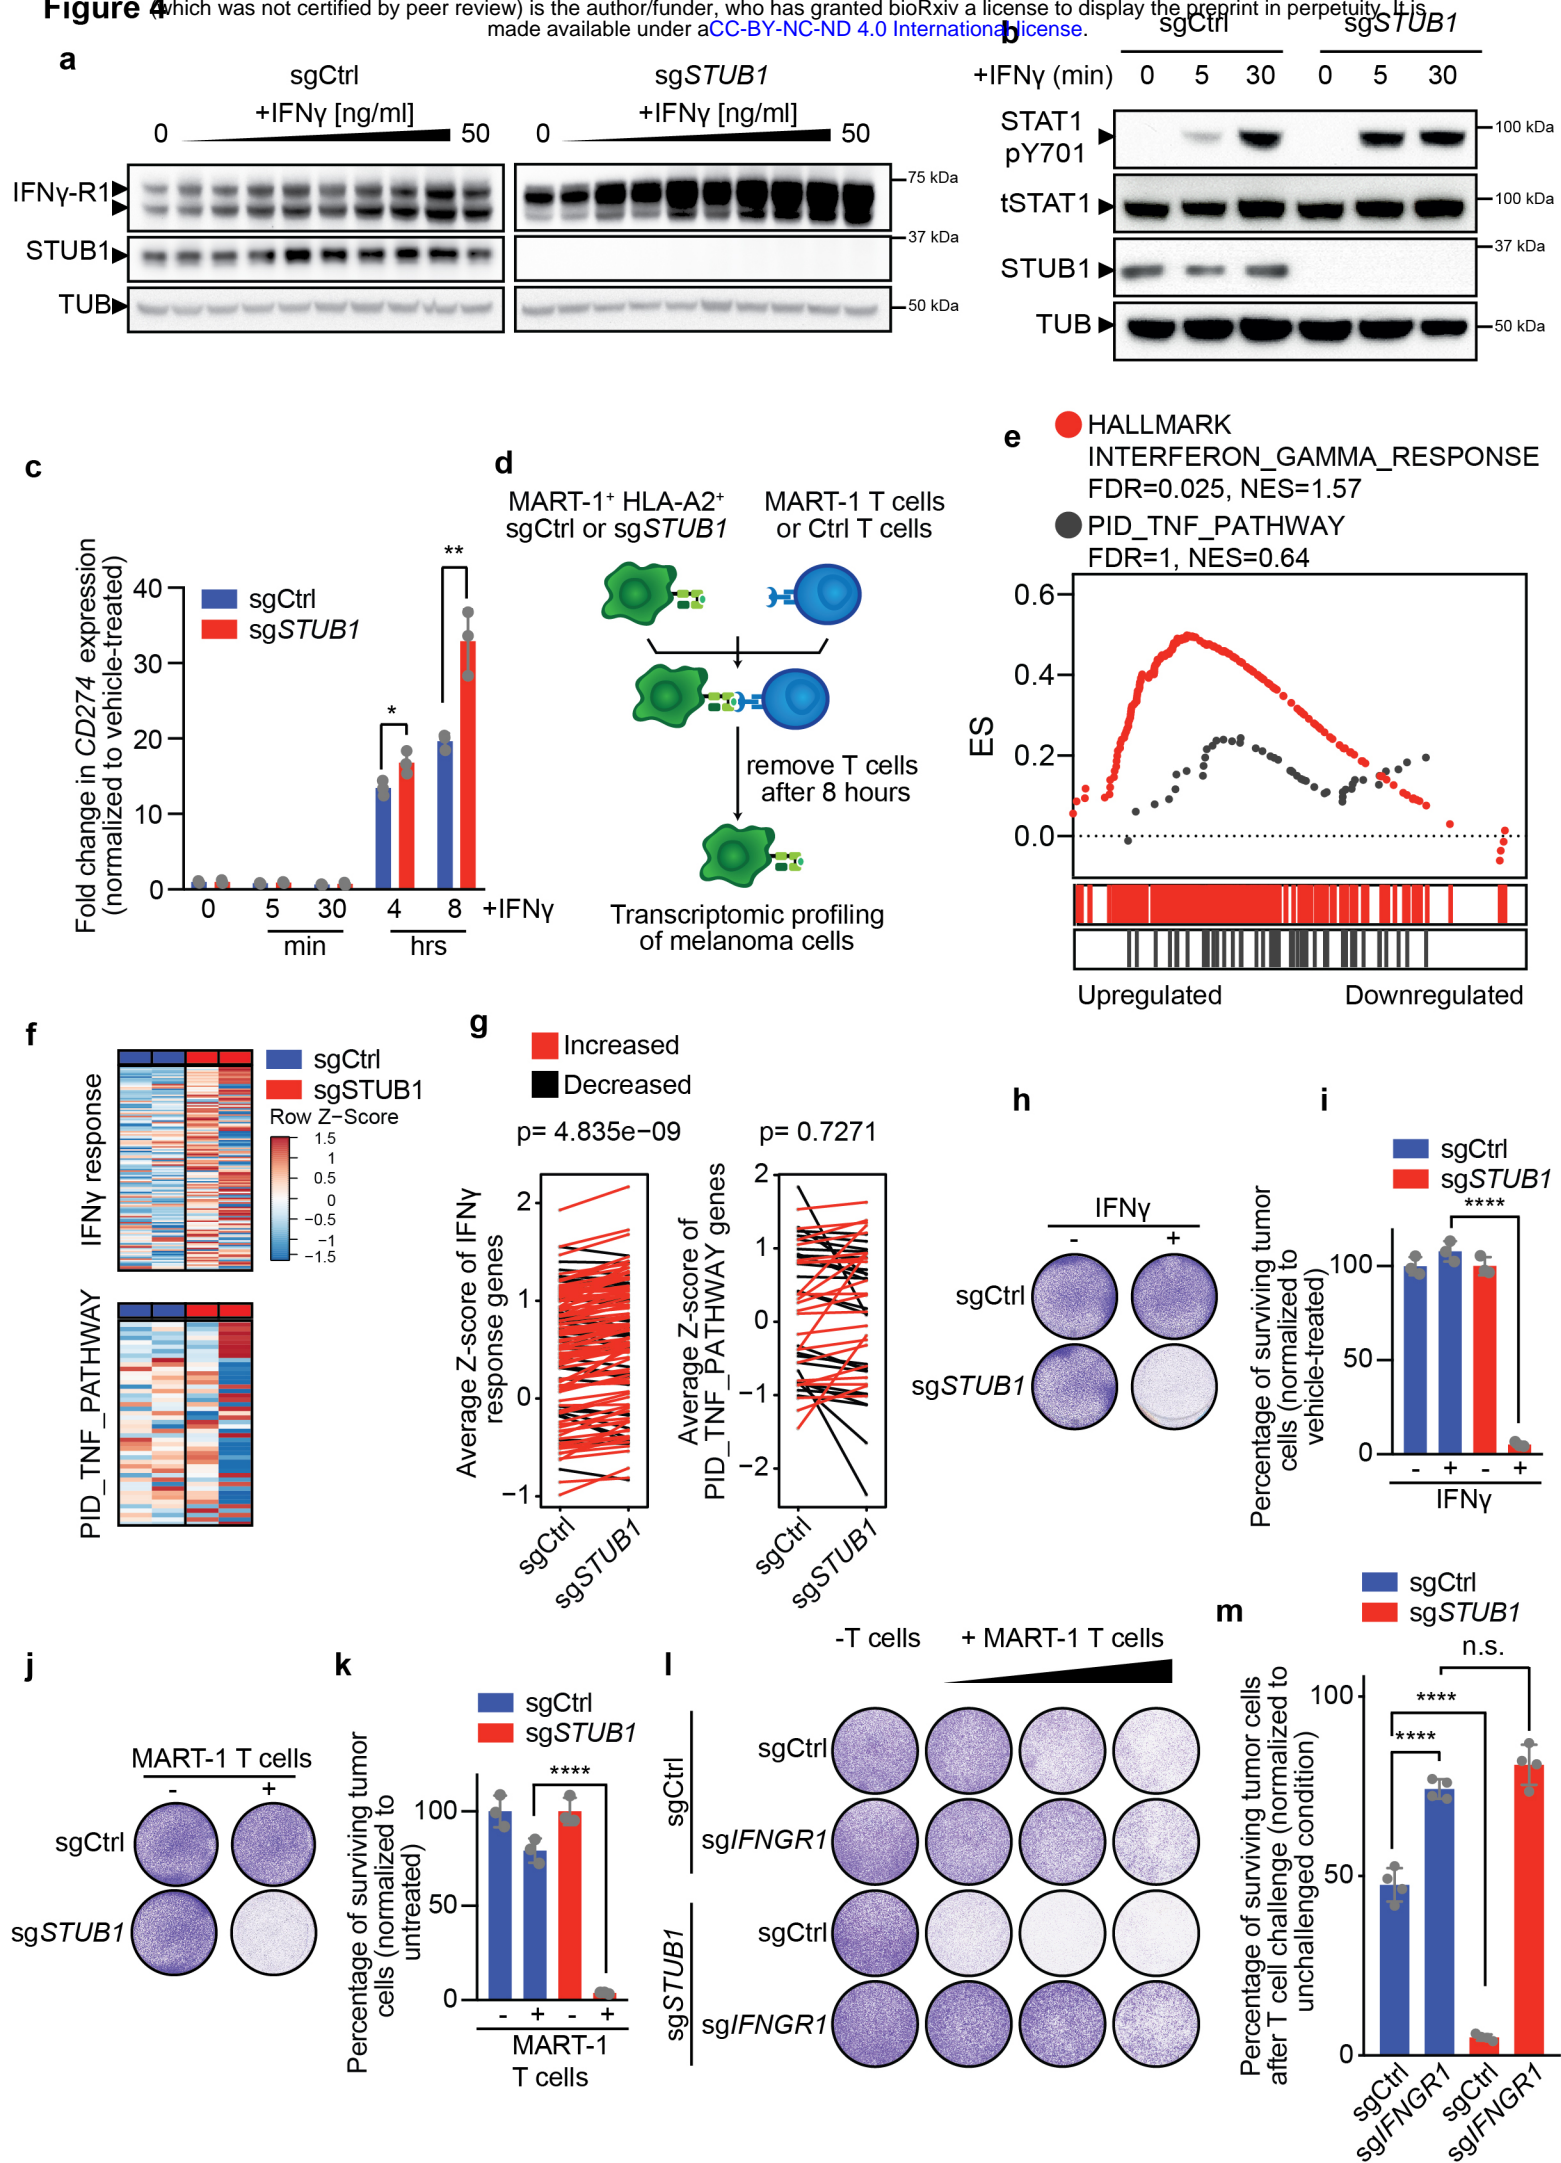



1060 **Figure 4: *STUB1* inactivation sensitizes melanoma cells to cytotoxic T cells**  
1061 **through amplified IFN $\gamma$  signaling.**

1062 **a**, Immunoblots of D10 melanoma cells expressing sgCtrl or sg*STUB1*, treated with a  
1063 two-fold serial dilution of IFN $\gamma$  (starting at 50 ng/ml) for 30 minutes. Same protein  
1064 amounts were loaded on two separate gels and whole cell lysates were immunoblotted  
1065 for the indicated proteins (TUB is tubulin) and developed at the same time. The same  
1066 exposure for the blots is shown.

1067 **b**, Immunoblot of D10 melanoma cells expressing sgCtrl or sg*STUB1*, treated with  
1068 either vehicle or 50 ng/ml IFN $\gamma$  for the indicated duration. Whole cell lysates were  
1069 immunoblotted for phosphorylated-tyrosine-701 (pY701) of STAT1, total STAT1  
1070 (tSTAT1), *STUB1* and Tubulin (TUB).

1071 **c**, qPCR analysis for the mRNA expression of *CD274* (encoding PD-L1) in D10  
1072 melanoma cells expressing either sgCtrl or sg*STUB1*, after treatment with 25 ng/ml  
1073 IFN $\gamma$  for the indicated duration.

1074 **d**, Schematic depiction of the experimental setup to profile the transcriptomes of D10  
1075 and SK-MEL-147 melanoma cells expressing sgCtrl or sg*STUB1*, which were co-  
1076 cultured with either Ctrl or MART-1 T cells for eight hours.

1077 **e**, Gene set enrichment analysis on RNA sequencing results for D10 and SK-MEL-  
1078 147 melanoma cells co-cultured with MART-1 T cells for eight hours (from **d**).

1079 **f**, Differential gene expression analysis of IFN $\gamma$  response genes (derived by treating  
1080 D10 and SK-MEL-147 melanoma cells with IFN $\gamma$  for eight hours, depicted in  
1081 **Supplementary Fig. 4d**) and PID\_TNF\_PATHWAY genes in D10 melanoma cells co-  
1082 cultured with MART-1 T cells for eight hours.

1083 **g**, Difference in either IFN $\gamma$  response gene expression or expression of  
1084 PID\_TNF\_PATHWAY genes between sgCtrl and sg*STUB1*-expressing D10  
1085 melanoma cells following MART-1 T cell challenge for eight hours.

1086 **h**, Colony formation assay of D10 melanoma cells expressing sgCtrl or sg*STUB1*  
1087 treated with either vehicle or 3 ng/ml IFN $\gamma$  for five days.

1088 **i**, Quantification of colony formation assay shown in (**h**).

1089 **j**, Colony formation assay of D10 melanoma cells expressing sgCtrl or sg*STUB1*  
1090 treated with either no or MART-1 T cells for 24 hours and subsequent culture for four  
1091 days.

1092 **k**, Quantification of colony formation assay shown in (**j**).

1093 **I**, Colony formation assay of D10 melanoma cells expressing the indicated sgRNAs,  
1094 which were co-cultured with either no or MART-1 T cells at T cell : melanoma cell  
1095 ratios 1:16, 1:8 and 1:4 (left to right) for 24 hours and stained four days later.  
1096 **m**, Quantification from (**I**) at a T cell : melanoma cell ratio of 1:8.  
1097 Mean $\pm$ SD in (**c**), \*\*p=0.0064, \*p=0.033, multiple t-tests for three biological replicates.  
1098 Average Z-score of respective genes in (**g**) from two biological replicates with paired  
1099 t-test.  
1100 Mean $\pm$ SD in (**i**), \*\*\*\*p<0.0001, ordinary one-way ANOVA for three biological replicates  
1101 with Tukey post hoc testing.  
1102 Mean $\pm$ SD in (**k**), \*\*\*\*p<0.0001, ordinary one-way ANOVA for three biological  
1103 replicates with Tukey post hoc testing.  
1104 Mean $\pm$ SD in (**m**), \*\*\*\*p<0.0001, n.s. p=0.1226, ordinary one-way ANOVA for four  
1105 biological replicates with Tukey post hoc testing.  
1106  
1107

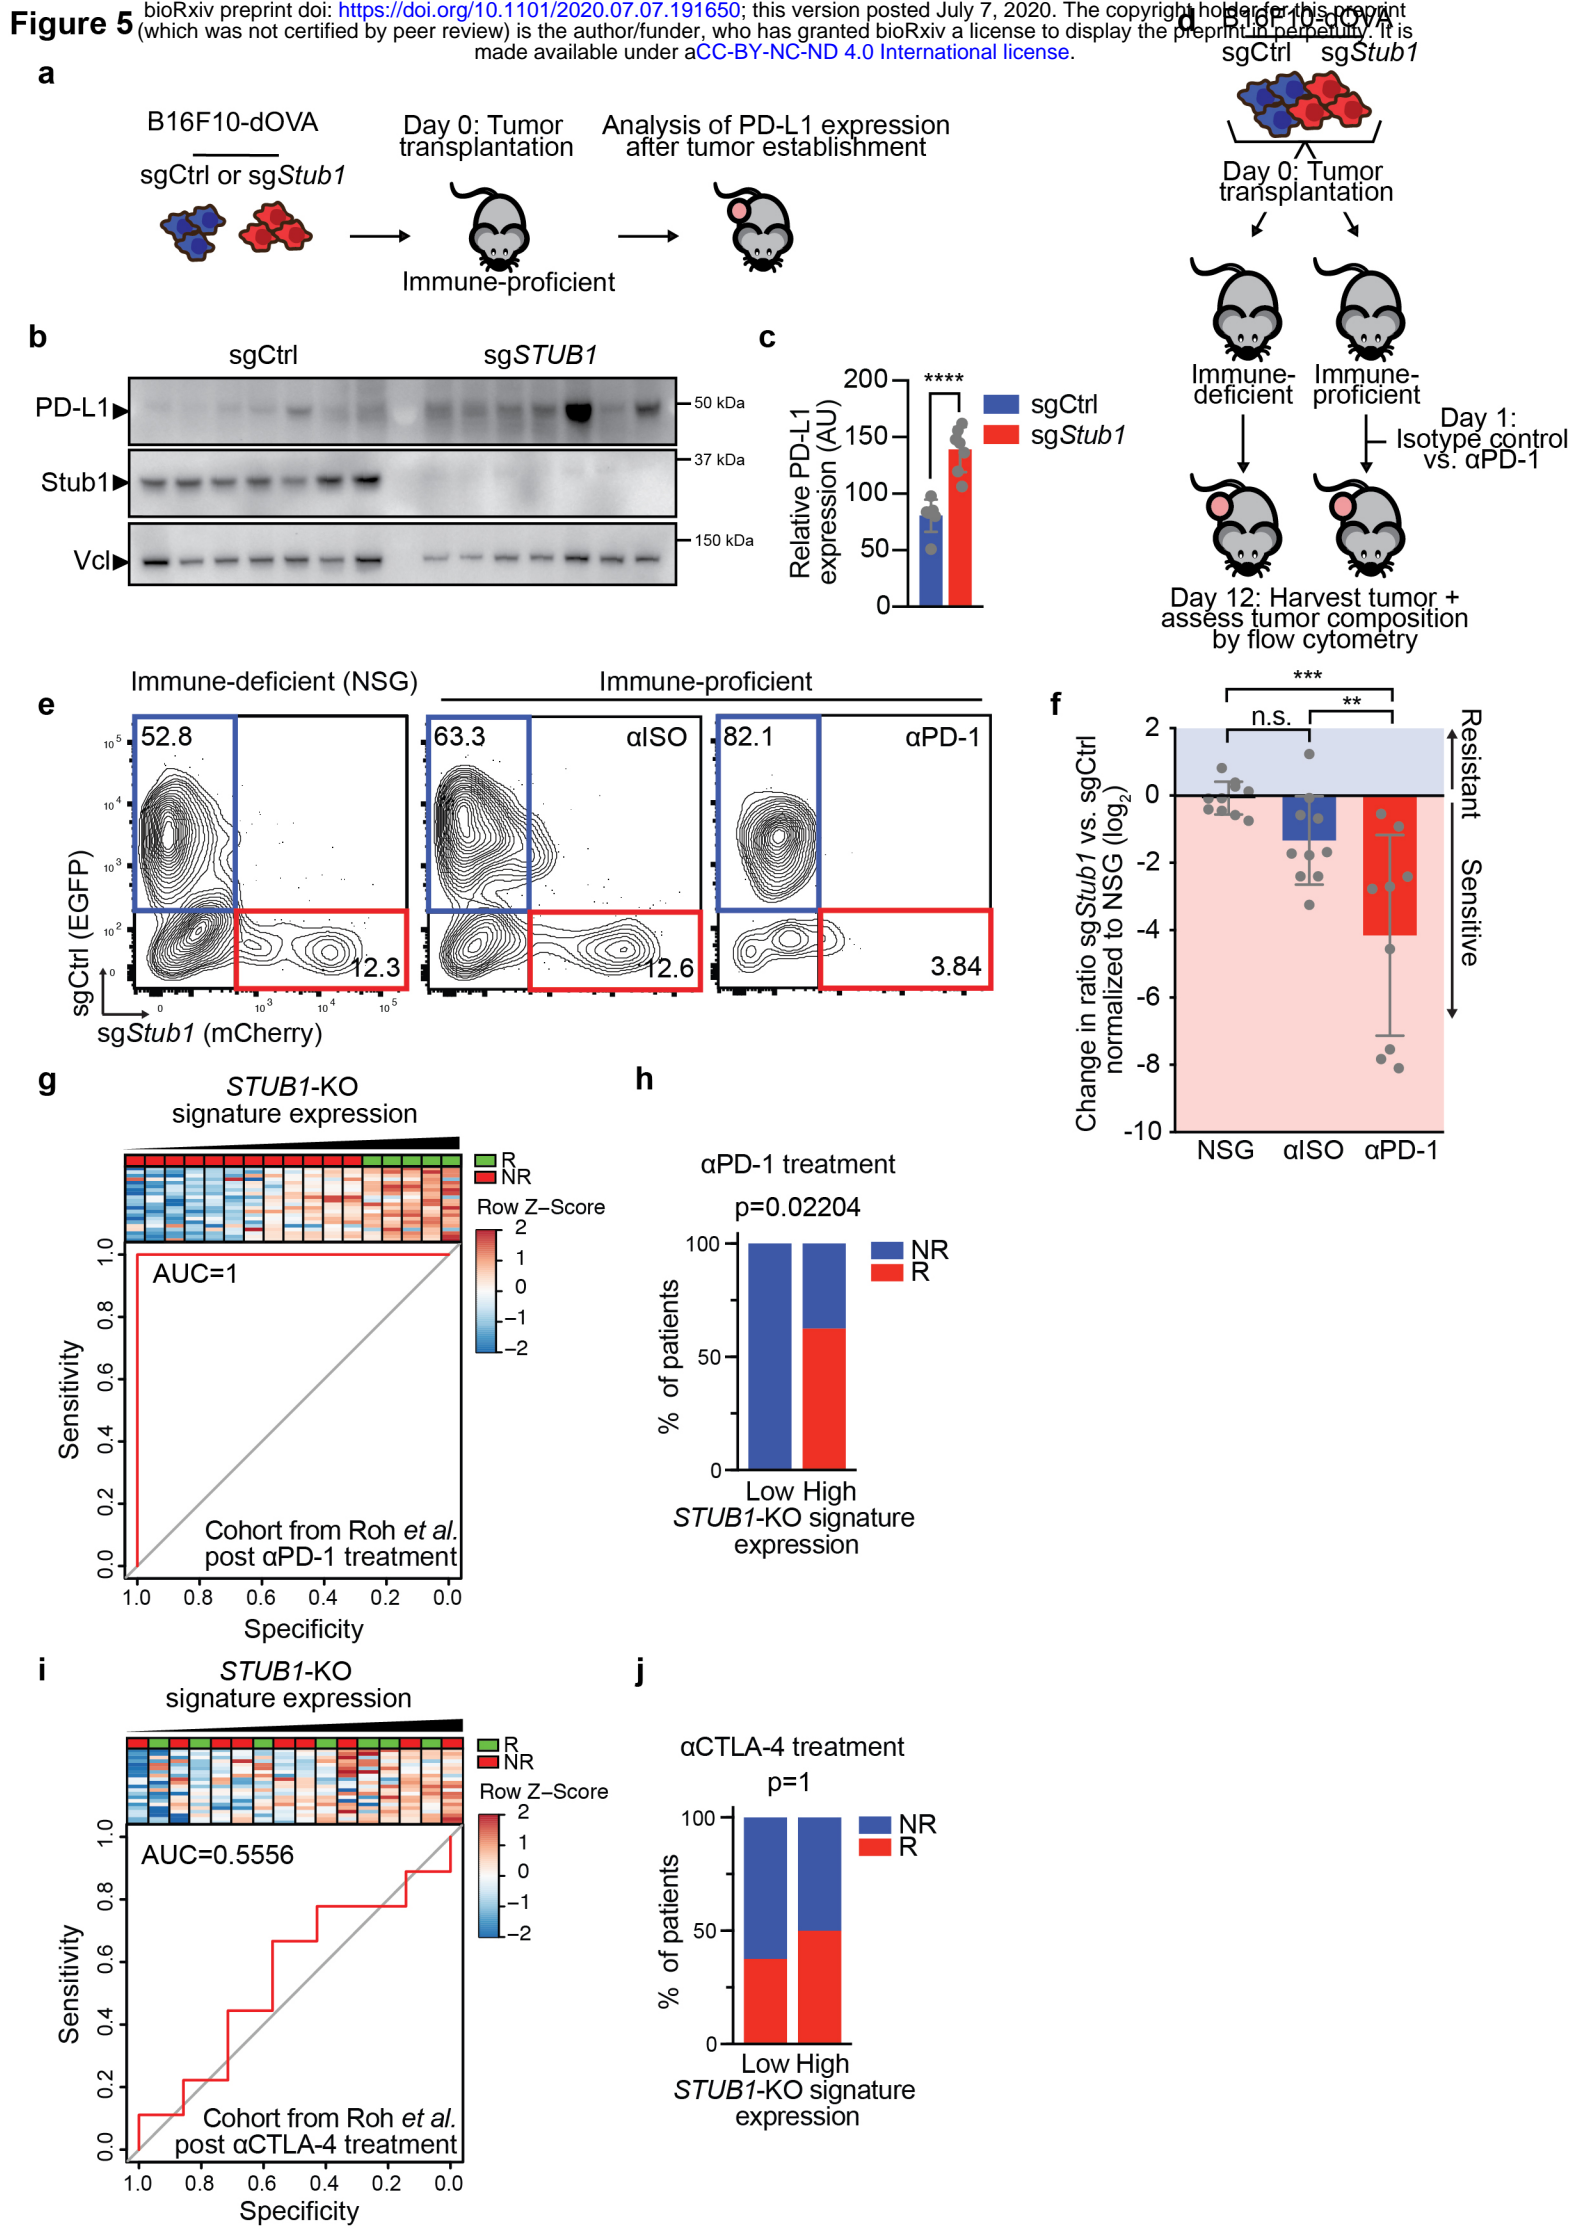

1108 **Figure 5: STUB1 inactivation and anti-PD-1 treatment constitute a rational**  
1109 **combination therapy approach.**

1110 **a**, Experimental outline to assess PD-L1 expression on either sgCtrl or sg*Stub1*  
1111 tumors.

1112 **b**, Immunoblot of B16F10-dOVA *in vivo* tumor samples expressing either sgCtrl or  
1113 sg*Stub1* (outlined in **a**) for the indicated proteins (Vcl is vinculin).

1114 **c**, Quantification of PD-L1 protein levels (relative to loading control) of tumor samples  
1115 from immunoblot shown in (**b**), AU=arbitrary units.

1116 **d**, Schematic depiction of the *in vivo* competition assay modelling anti-PD-1 response  
1117 with B16F10-dOVA cells expressing either sgCtrl or sg*Stub1*, which were differentially  
1118 labelled with EGFP and mCherry, respectively.

1119 **e**, Flow cytometry plots from each group of the *in vivo* experiment outlined in (**d**) NSG,  
1120 Isotype control-treated ( $\alpha$ ISO), anti-PD-1-treated ( $\alpha$ PD-1).

1121 **f**, Quantification of *in vivo* competition assay outlined in (**d**). Ratios of mCherry vs.  
1122 EGFP were normalized to the NSG condition.

1123 **g**, Composite plot consisting of a heat map showing melanoma patients from the post  
1124 anti-PD-1 treatment cohort of Roh *et al.* 2017, sorted according to the *STUB1*-KO  
1125 signature expression (average Z-score per sample), and ROC plot showing the  
1126 predictive power of the *STUB1*-KO signature in this cohort.

1127 **h**, Median of *STUB1*-KO signature expression in patients from (**g**) was used to divide  
1128 patients into *STUB1*-KO signature high and low-expressing groups and percentage  
1129 responders and non-responders in each group was plotted.

1130 **i**, Composite plot consisting of a heat map showing melanoma patients from the post  
1131 anti-CTLA-4 treatment cohort of Roh *et al.* 2017, which were sorted according to  
1132 *STUB1*-KO signature expression (average Z-score per sample) and ROC plot showing  
1133 the predictive power of the *STUB1*-KO signature in this cohort.

1134 **j**, Median of *STUB1*-KO signature expression in patients from (**i**) was used to divide  
1135 patients into *STUB1*-KO signature high and low-expressing groups and percentage  
1136 responders and non-responders in each group was plotted.

1137 Mean $\pm$ SD in (**c**), \*\*\*\* p<0.0001, unpaired two-tailed t-test, n=7 tumors per group.

1138 Mean $\pm$ SD in (**f**), \*\*\* p=0.0002, \*\*p=0.0073, n.s. p=0.2985, ordinary one-way ANOVA  
1139 with Tukey post hoc testing for n=10 in NSG and  $\alpha$ ISO and n=9 in  $\alpha$ PD-1.

1140

1141

**Table 1. STUB1-KO signature gene set**

|               |               |                |                |               |
|---------------|---------------|----------------|----------------|---------------|
| <i>ACOD1</i>  | <i>EFNA1</i>  | <i>IFIH1</i>   | <i>PRDX1</i>   | <i>SNTB2</i>  |
| <i>BIRC3</i>  | <i>FST</i>    | <i>IFIT2</i>   | <i>PSMB8</i>   | <i>SOCS3</i>  |
| <i>CCL2</i>   | <i>GBP1</i>   | <i>IFIT3</i>   | <i>RALA</i>    | <i>SOD2</i>   |
| <i>CD47</i>   | <i>GBP2</i>   | <i>IKZF2</i>   | <i>RC3H1</i>   | <i>THBS1</i>  |
| <i>CFH</i>    | <i>GBP4</i>   | <i>KYNU</i>    | <i>RNF145</i>  | <i>TRIM22</i> |
| <i>CTSS</i>   | <i>GBP5</i>   | <i>LIFR</i>    | <i>SAMD9L</i>  | <i>XRN1</i>   |
| <i>CXCL10</i> | <i>HEG1</i>   | <i>OAS2</i>    | <i>SAMHD1</i>  |               |
| <i>CXCL11</i> | <i>HLA-B</i>  | <i>OSMR</i>    | <i>SELENOK</i> |               |
| <i>CXCL9</i>  | <i>IDO1</i>   | <i>PARP14</i>  | <i>SFT2D2</i>  |               |
| <i>DDX58</i>  | <i>IFI44L</i> | <i>PLEKHS1</i> | <i>SLAMF8</i>  |               |

1142 **Table 1: *STUB1*-KO signature gene set**

1143 *STUB1*-KO signature gene set established through transcriptomic profiling sgCtrl or  
1144 sg*STUB1*-expressing D10 and SK-MEL-147 melanoma cell lines, which were  
1145 challenged with either Ctrl or MART-1-specific T cells for eight hours (outlined in **Fig.**  
1146 **4d**). The gene set is based on genes that were relatively stronger induced in  
1147 sg*STUB1*-expressing cells after MART-1-specific T cell challenge.

1148

1149

1150

1151

1152

1153

1154

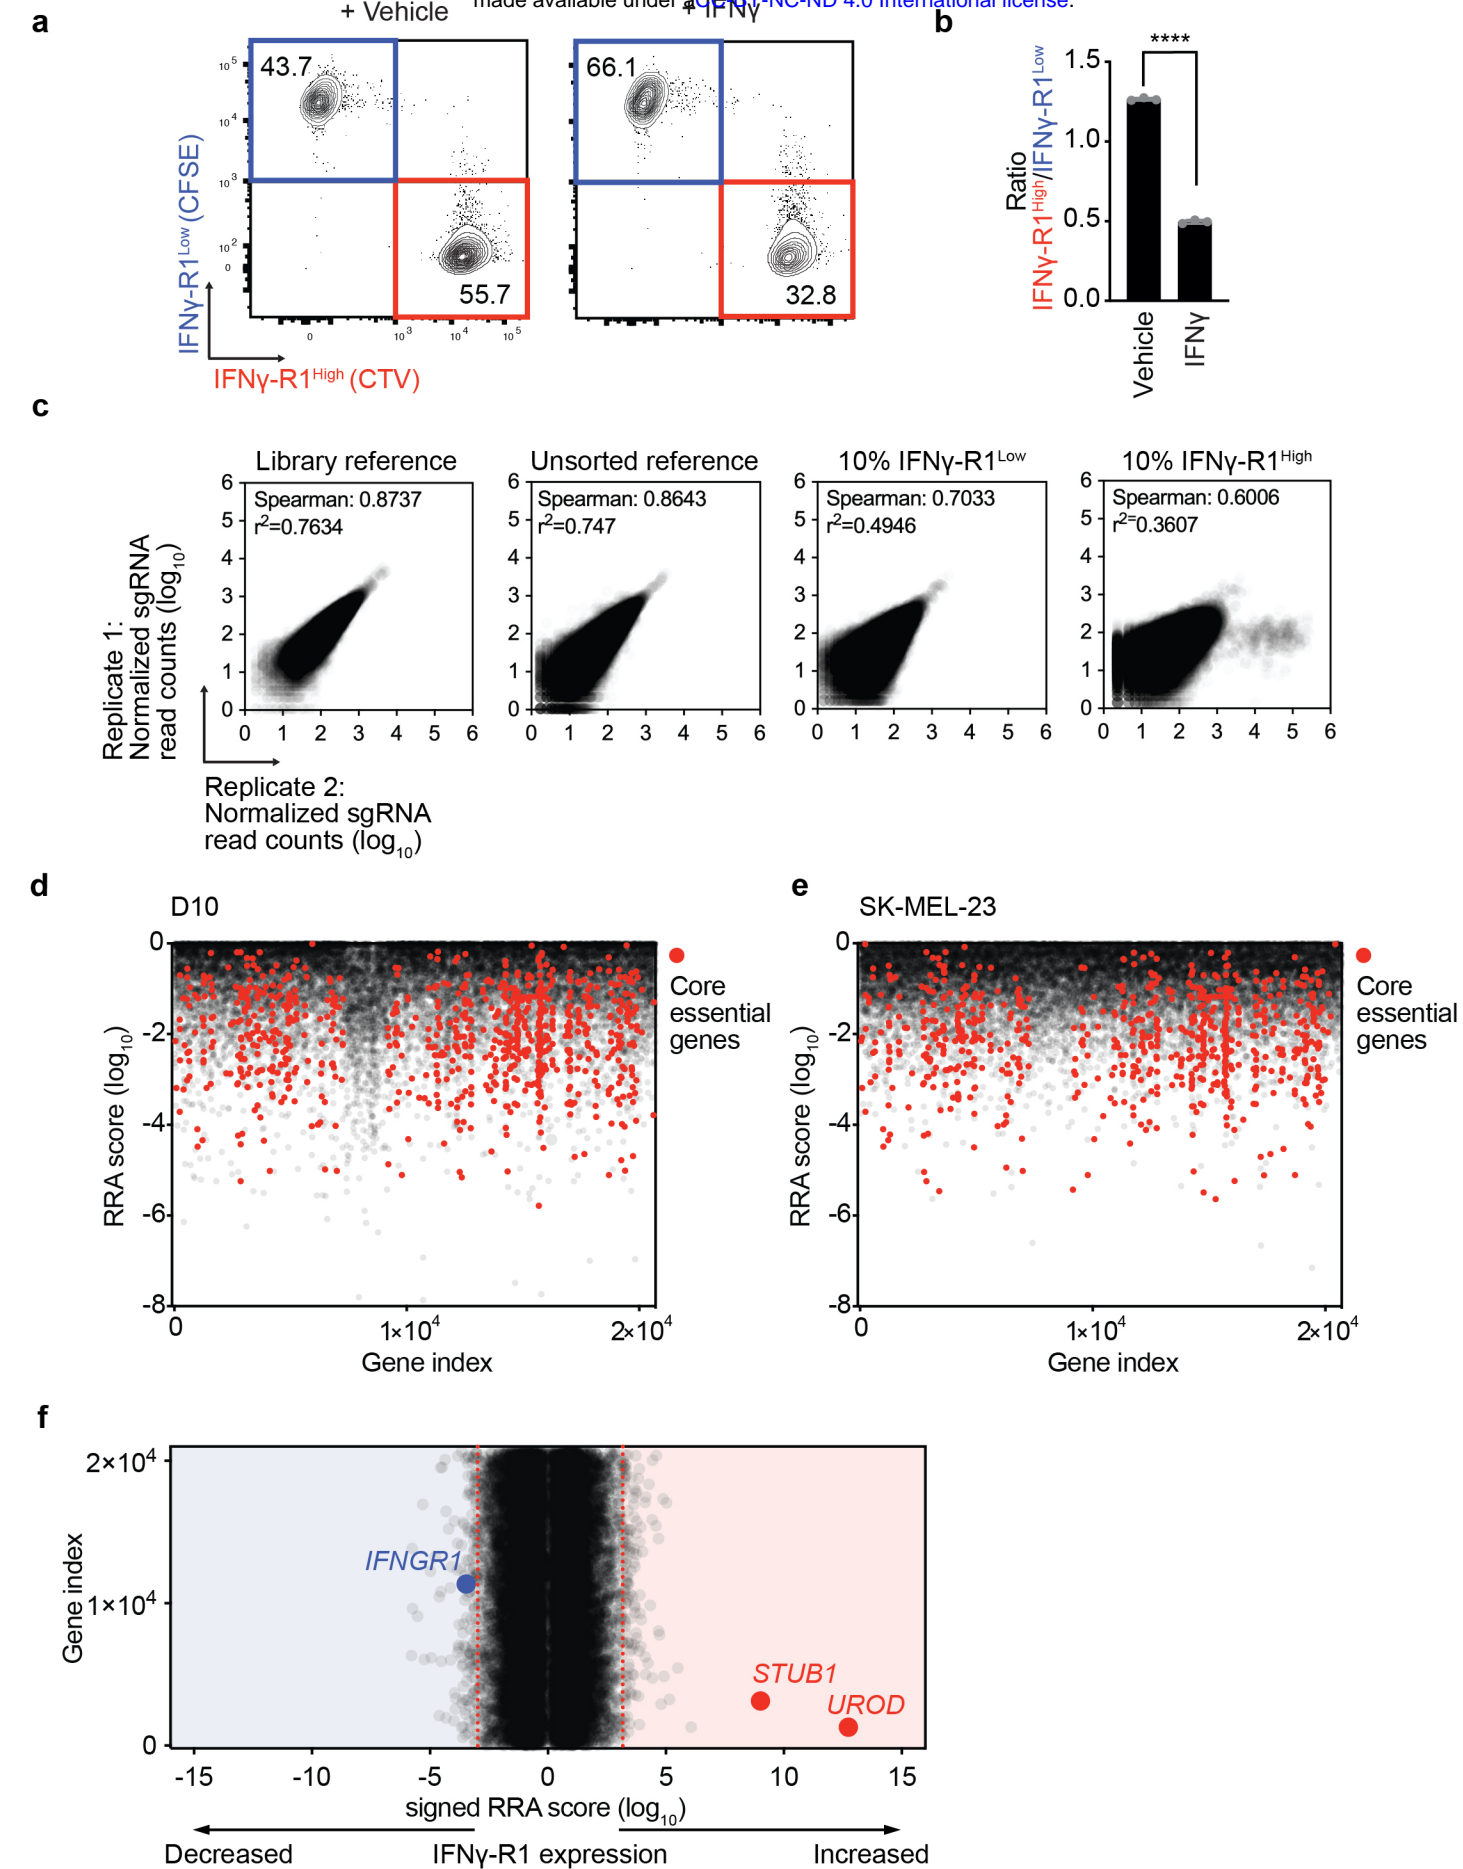

1155 **Supplementary Figure Legends**

1156

1157 **Supplementary Figure 1: Genome-wide CRISPR/Cas9 knockout screen**  
1158 **identifies negative regulators of IFN $\gamma$ -R1 expression to modulate its cell surface**  
1159 **abundance.**

1160 **a**, Flow cytometry plot of *in vitro* competition assay of IFN $\gamma$ -R1<sup>High</sup> vs. IFN $\gamma$ -R1<sup>Low</sup> cells  
1161 treated with either vehicle or 25 ng/ml IFN $\gamma$  for five days.

1162 **b**, Quantification of the ratio IFN $\gamma$ -R1<sup>High</sup> : IFN $\gamma$ -R1<sup>Low</sup> in competition assay of **(a)**.

1163 **c**, Correlation plots of log<sub>10</sub>-transformed normalized read counts of sgRNAs in  
1164 genome-wide CRISPR-KO screen in D10 melanoma cell line between replicates.

1165 **d, e**, Log<sub>10</sub>-transformed RRA scores of depleted genes comparing library reference  
1166 sample to unsorted bulk population in D10 **(d)** and SK-MEL-23 cells **(e)**. Highlighted  
1167 in red: core essential genes. y-axis: RRA score, x-axis: gene index.

1168 **f**, Results of screen outlined in **(Figure 1f)** for SK-MEL-23 cells. x-axis: signed log<sub>10</sub>-  
1169 transformed signed MAGeCK robust rank aggregation (RRA) score for each gene; y-  
1170 axis: gene index. Red dotted lines indicate FDR cutoff <0.25 for genes enriched in  
1171 10% of cells with the highest (right) or lowest (left) IFNGR1 expression.

1172 Mean $\pm$ SD in **(b)**, \*\*\*\*p<0.0001, unpaired t-test for three biological replicates.

1173

1174



# Supplementary Figure 2

bioRxiv preprint doi: <https://doi.org/10.1101/2020.07.07.191650>; this version posted July 7, 2020. The copyright holder for this preprint (which was not certified by peer review) is the author/funder, who has granted bioRxiv a license to display the preprint in perpetuity. It is made available under aCC-BY-NC-ND 4.0 International license.

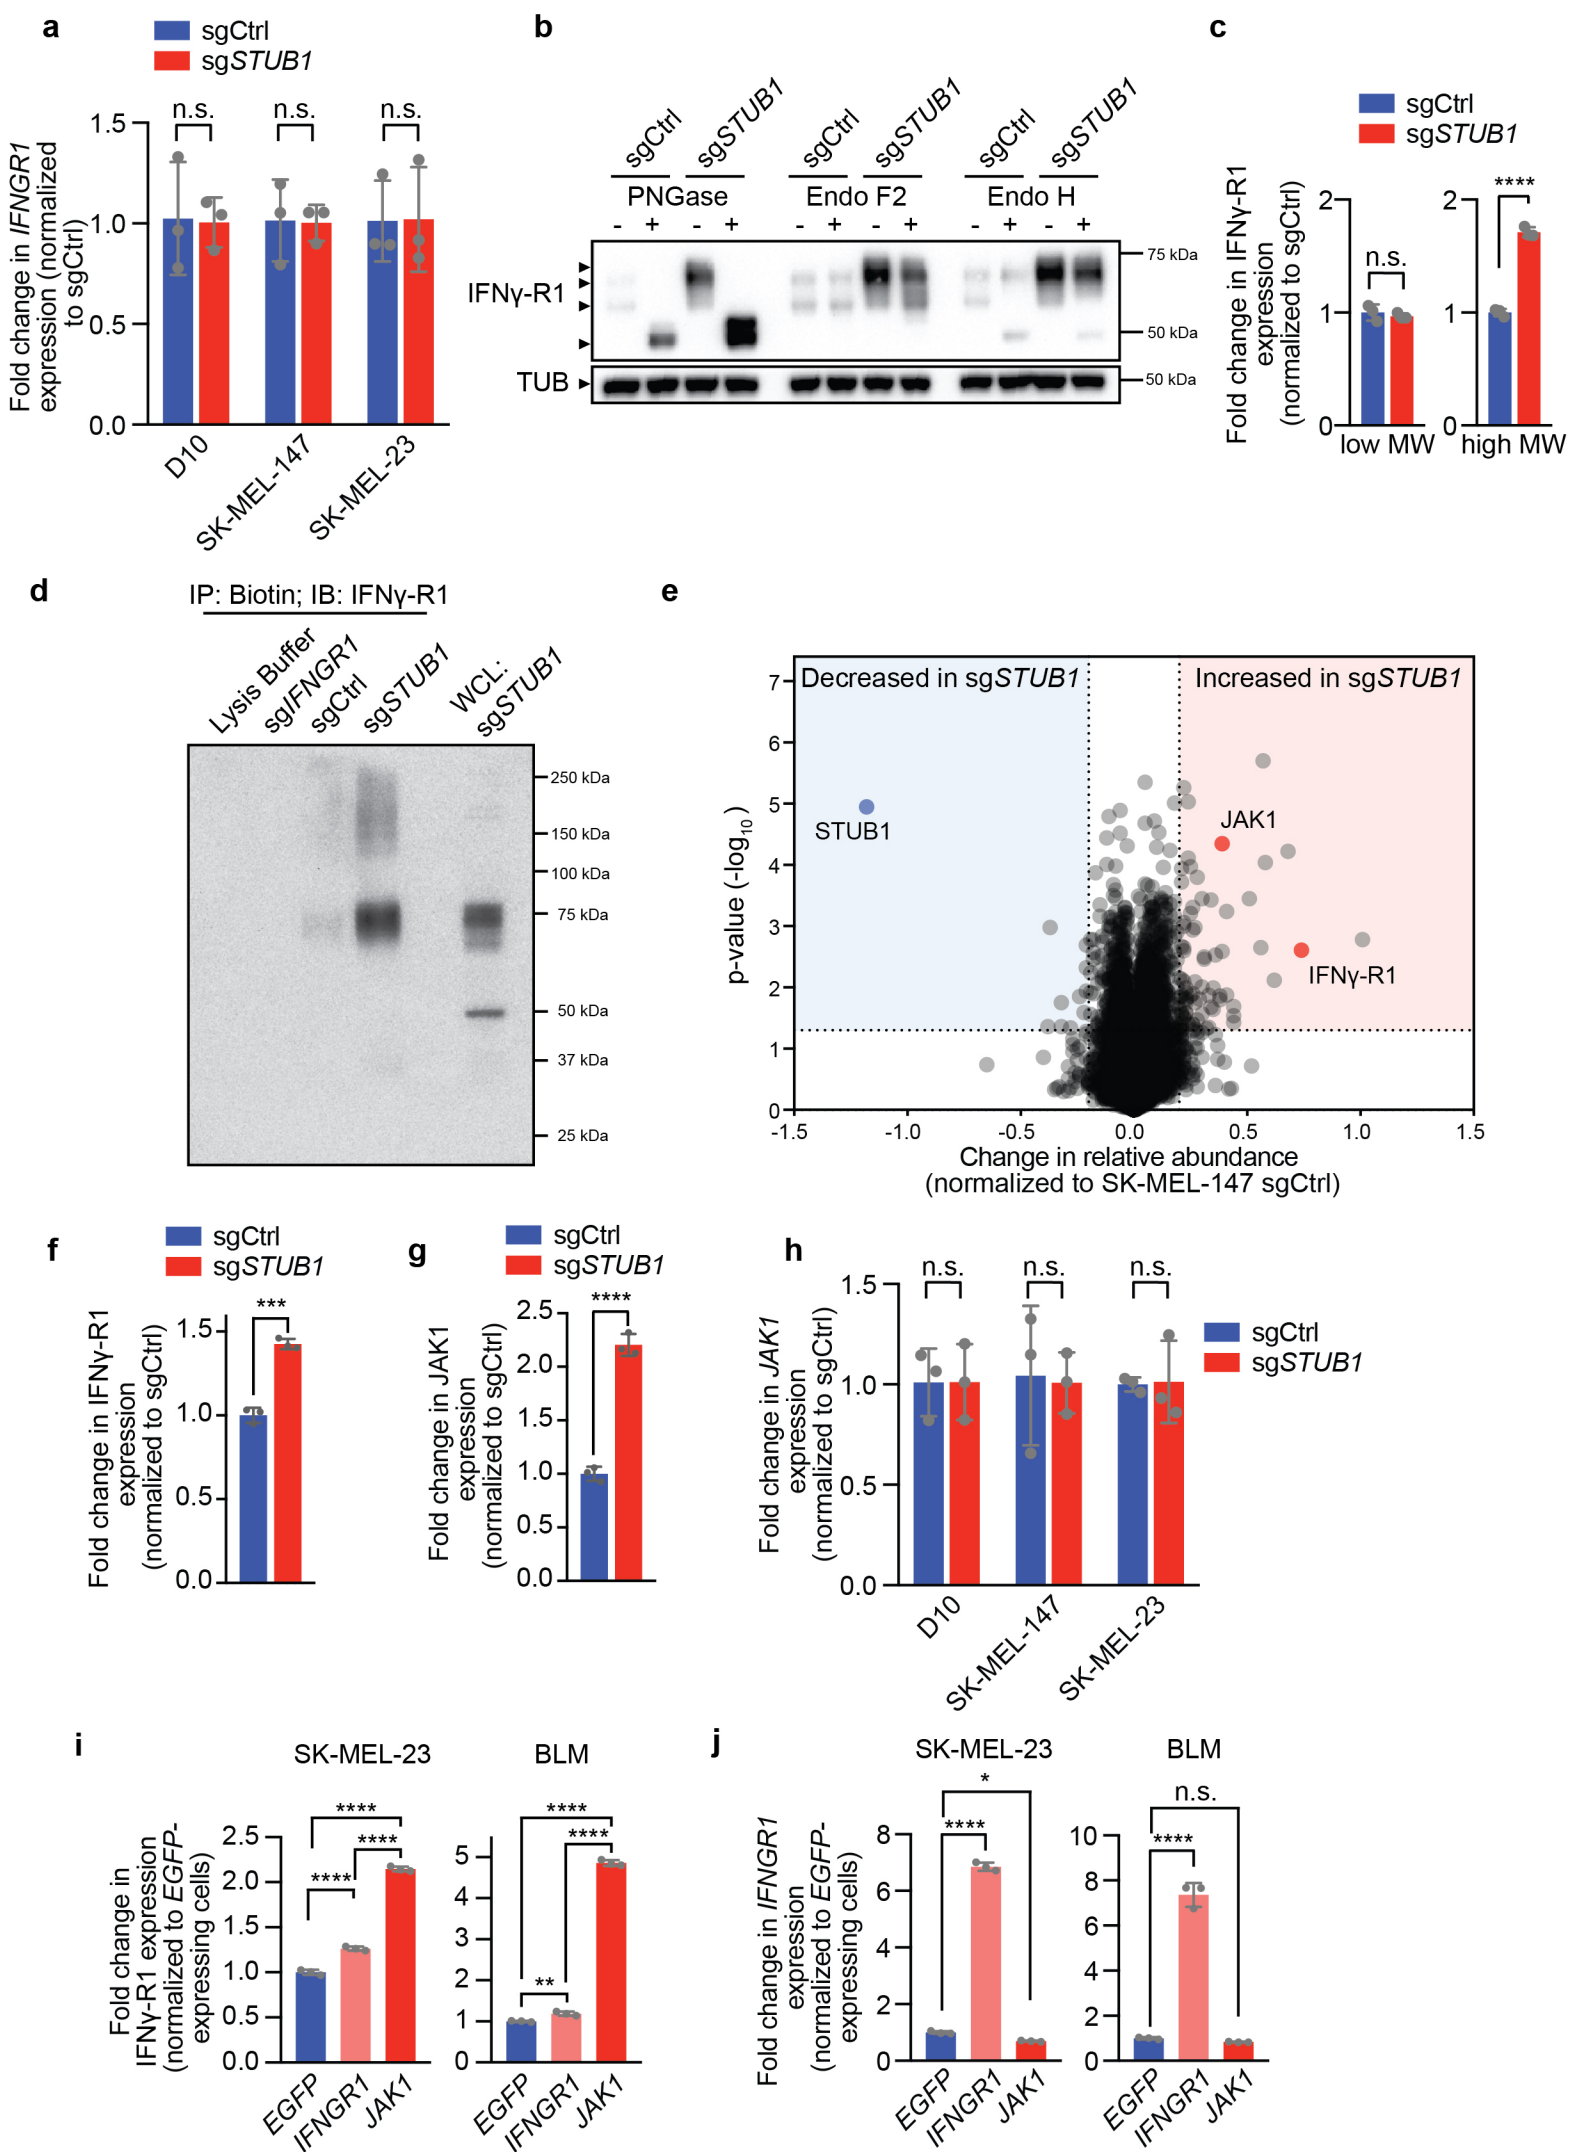

1175 **Supplementary Figure 2: STUB1 destabilizes cell surface IFN $\gamma$ -R1 in JAK1-**  
1176 **dependent and JAK1-independent manners.**

1177 **a**, Results of qPCR analysis for *IFNGR1* mRNA expression (relative to *RPL13*  
1178 expression) in D10, SK-MEL-147 and SK-MEL-23 cells expressing either sgCtrl or  
1179 sg*STUB1*.

1180 **b**, Immunoblot of whole cell lysates treated with the indicated deglycosylating  
1181 enzymes. Whole cell lysates were collected from D10 melanoma cells expressing  
1182 either sgCtrl or sg*STUB1*. Whole cell lysates were immunoblotted for IFN $\gamma$ -R1 and  
1183 Tubulin.

1184 **c**, Quantification of low and high molecular weight IFN $\gamma$ -R1 protein levels (relative to  
1185 loading control) in D10 melanoma cells from immunoblot shown in (**Figure 2d**).

1186 **d**, Immunoblot of immuno-precipitated cell surface proteins using biotin labelling in  
1187 D10 melanoma clone deficient in *IFNGR1*, or D10 melanoma cell pool expressing  
1188 either sgCtrl or sg*STUB1*. Following immunoprecipitation of biotin-labelled proteins,  
1189 samples were immunoblotted for IFN $\gamma$ -R1. The right-most lane represents 10% of the  
1190 whole cell lysate of sg*STUB1*-expressing cells.

1191 **e**, Results of proteomic profiling of SK-MEL-147 melanoma cells expressing either  
1192 sgCtrl or sg*STUB1*. Highlighted are the top differentially regulated proteins shared  
1193 between sgCtrl and sg*STUB1*-expressing D10 and SK-MEL-147 cells (**Fig. 2c**).

1194 **f**, Quantification of IFN $\gamma$ -R1 protein levels (relative to loading control) in D10  
1195 melanoma cells from immunoblot shown in (**Figure 2d**).

1196 **g**, Quantification of JAK1 protein levels (relative to loading control) in D10 melanoma  
1197 cells from immunoblot shown in (**Figure 2d**).

1198 **h**, Results of qPCR analysis for *JAK1* mRNA expression (relative to *RPL13*  
1199 expression) in D10, SK-MEL-147 and SK-MEL-23 cells expressing either sgCtrl or  
1200 sg*STUB1*.

1201 **i**, Quantification of IFN $\gamma$ -R1 expression (relative to *EGFP*-ORF-expressing cells) by  
1202 flow cytometry in SK-MEL-23 and BLM-M melanoma cells expressing *EGFP*-ORF,  
1203 *IFNGR1*-ORF and *JAK1*-ORF.

1204 **j**, Results of qPCR analysis for *IFNGR1* mRNA expression (relative to *RPL13*  
1205 expression) in SK-MEL-23 and BLM-M melanoma cells expressing *EGFP*-ORF,  
1206 *IFNGR1*-ORF and *JAK1*-ORF. Relative *IFNGR1* expression was normalized to *EGFP*-  
1207 ORF-expressing cells.

1208 Mean±SD in (a), D10: n.s. p=0.918, SK-MEL-147: n.s. p=0.933, SK-MEL-23: n.s.  
1209 p=0.968, unpaired t-tests were performed for each cell line, each three biological  
1210 replicates.  
1211 Mean±SD in (c), \*\*\*\*p<0.0001, n.s. p=0.5029, unpaired t-test for three biological  
1212 replicates.  
1213 Mean±SD in (f), \*\*\*p=0.0002, unpaired t-test for three biological replicates.  
1214 Mean±SD in (g), \*\*\*\*p<0.0001, unpaired t-test for three biological replicates.  
1215 Mean±SD in (h), D10: n.s. p=0.99, SK-MEL-147: n.s. p=0.877, SK-MEL-23: n.s.  
1216 p=0.921, multiple t-test for three biological replicates.  
1217 Mean±SD in (i), \*\*p=0.0093, \*\*\*\*p<0.0001, ordinary one-way ANOVA for three  
1218 biological replicates with Tukey post hoc testing.  
1219 Mean±SD in (j), \*p=0.0103, \*\*\*\*p<0.0001, n.s. p=0.7409, ordinary one-way ANOVA  
1220 for three biological replicates with Dunnett post hoc testing.  
1221

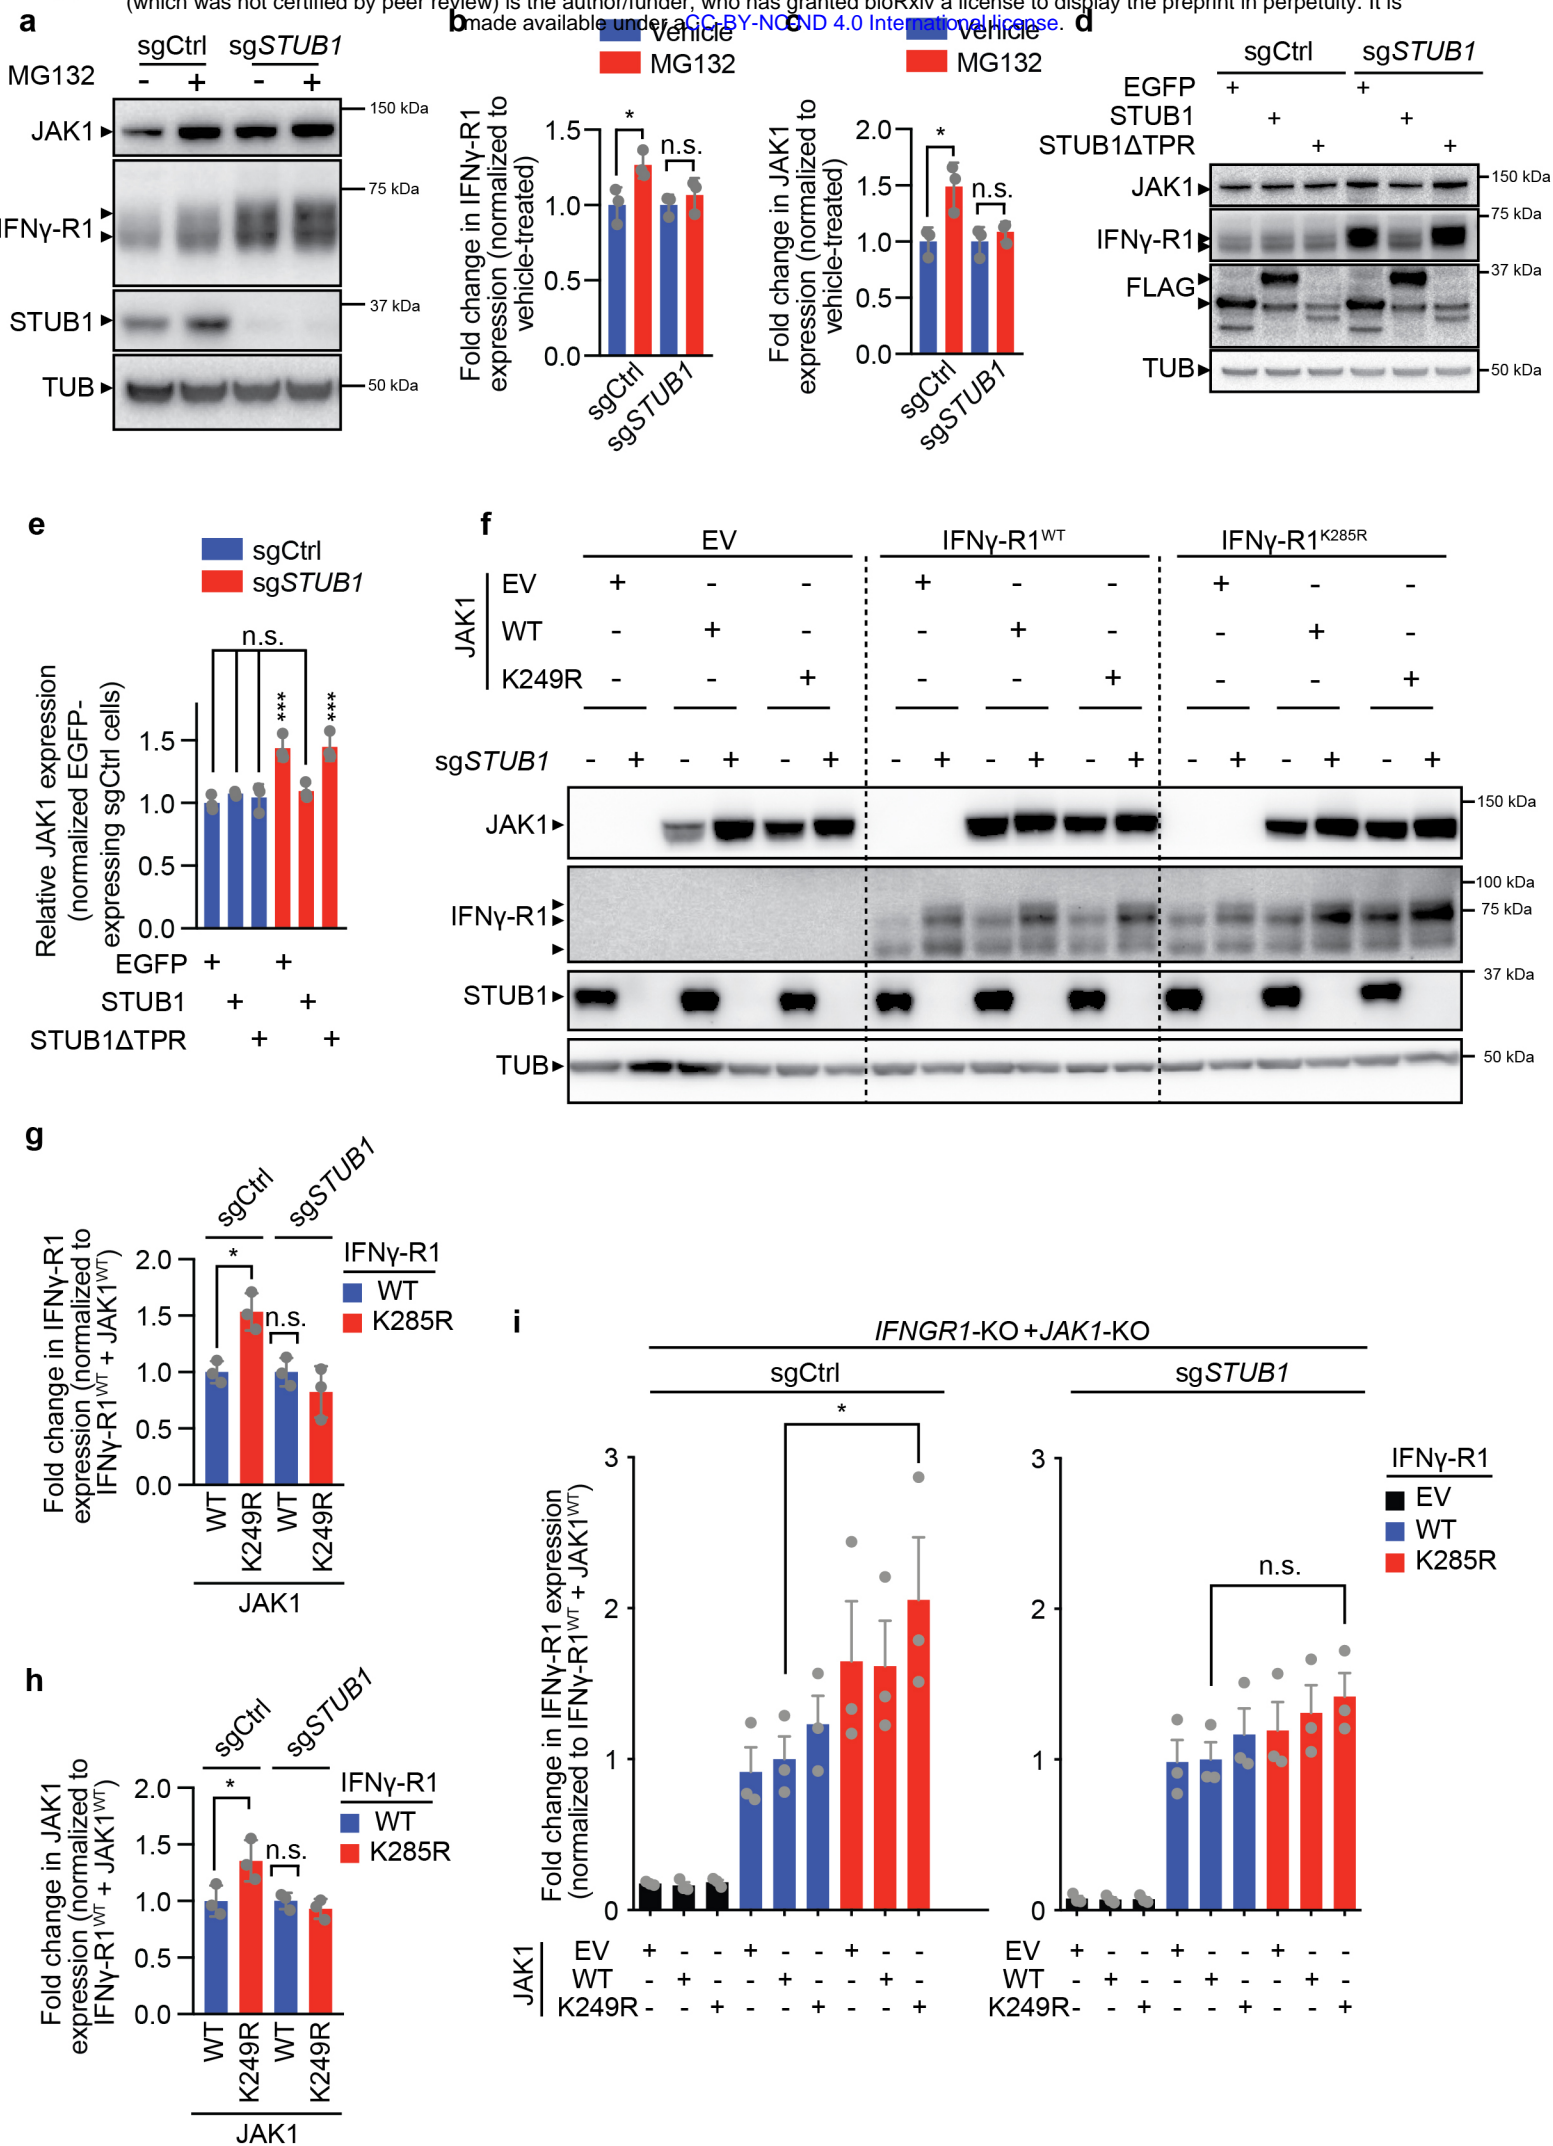

1222 **Supplementary Figure 3: STUB1 drives proteasomal degradation of IFN $\gamma$**   
1223 **receptor complex through IFN $\gamma$ -R1<sup>K285</sup> and JAK1<sup>K249</sup> residues.**

1224 **a**, Immunoblot of SK-MEL-147 melanoma cells expressing either sgCtrl or sgSTUB1  
1225 treated with either vehicle or 10  $\mu$ M MG132 for four hours. Whole-cell lysates were  
1226 immunoblotted for the indicated proteins (TUB is Tubulin).

1227 **b**, Quantification of IFN $\gamma$ -R1 protein levels (relative to loading control and normalized  
1228 to vehicle-treated group) from (a).

1229 **c**, Quantification of JAK1 protein levels (relative to loading control and normalized to  
1230 vehicle-treated group) from (a).

1231 **d**, Immunoblot of D10 melanoma cells expressing either sgCtrl or sgSTUB1, that  
1232 ectopically express either 3xFLAG-tagged EGFP, full length STUB1 or STUB1 lacking  
1233 N-terminal residues 1-72 of the TPR domain. Whole cell lysates were blotted for the  
1234 indicated proteins (TUB is Tubulin).

1235 **e**, Quantification of JAK1 protein levels (relative to loading control and normalized to  
1236 EGFP- and sgCtrl-expressing cells) from immunoblot depicted in (d).

1237 **f**, Immunoblot of whole cell lysates from *IFNGR1*-KO + *JAK1*-KO D10 melanoma  
1238 clones reconstituted with the indicated *IFNGR1* and *JAK1* cDNAs, for the indicated  
1239 proteins (TUB is Tubulin).

1240 **g**, Quantification of IFN $\gamma$ -R1 protein levels on immunoblot in **Figure 3j** (relative to  
1241 loading control and normalized to IFN $\gamma$ -R1<sup>WT</sup> and JAK1<sup>WT</sup>-expressing cells) in  
1242 *IFNGR1*-KO + *JAK1*-KO D10 melanoma clones expressing either IFN $\gamma$ -R1<sup>WT</sup> and  
1243 JAK1<sup>WT</sup> or with IFN $\gamma$ -R1<sup>K285R</sup> and JAK1<sup>K249R</sup>.

1244 **h**, Quantification of JAK1 protein levels on immunoblot in **Figure 3j** (relative to loading  
1245 control and normalized to IFN $\gamma$ -R1<sup>WT</sup> and JAK1<sup>WT</sup>-expressing cells) in *IFNGR1*-KO +  
1246 *JAK1*-KO D10 melanoma clones expressing either IFN $\gamma$ -R1<sup>WT</sup> and JAK1<sup>WT</sup> or with  
1247 IFN $\gamma$ -R1<sup>K285R</sup> and JAK1<sup>K249R</sup>.

1248 **i**, Quantification of IFN $\gamma$ -R1 expression by flow cytometry in *IFNGR1*-KO + *JAK1*-KO  
1249 D10 melanoma clones reconstituted with the indicated *IFNGR1* and *JAK1* cDNAs  
1250 (outlined in **Figure 3f**), shown as fold-change of IFN $\gamma$ -R1 MFI relative to IFN $\gamma$ -R1<sup>WT</sup> +  
1251 JAK1<sup>WT</sup>-expressing cells for each respective genotype. EV = empty vector control.

1252 Mean $\pm$ SD in (b), \*p=0.0435, n.s. p=0.8357, ordinary one-way ANOVA for three  
1253 biological replicates with Tukey post hoc testing.

1254 Mean $\pm$ SD in (c), \*p=0.0138, n.s. p=0.8846, ordinary one-way ANOVA for three  
1255 biological replicates with Tukey post hoc testing.

1256 Mean±SD in **(e)**, \*\*\*p=0.004, \*\*\*p=0.003, n.s. p=0.7405, p=9996, p=0.972, ordinary  
1257 one-way ANOVA for three biological replicates with Tukey post hoc testing.

1258 Mean±SD in **(g)**, \*p=0.0156, n.s. p=0.5704, ordinary one-way ANOVA for three  
1259 immunoblots with Tukey post hoc testing.

1260 Mean±SD in **(h)**, \*p=0.0366, n.s. p=0.9068, ordinary one-way ANOVA for three  
1261 biological replicates with Tukey post hoc testing.

1262 Mean±SD in **(i)**, \*p=0.036, n.s. p=0.9812, ordinary one-way ANOVA for three  
1263 biological replicates, with Tukey post hoc testing.

1264

1265



1266 **Supplementary Figure 4: *STUB1* inactivation sensitizes melanoma cells to**  
1267 **cytotoxic T cells through amplified IFN $\gamma$  signaling.**

1268 **a**, qPCR analysis for *IDO1* mRNA expression in D10 melanoma cells expressing either  
1269 sgCtrl or sg*STUB1*, which were treated with 25 ng/ml IFN $\gamma$  for the indicated duration.

1270 **b**, Flow cytometry analysis of IFN $\gamma$ -induced PD-L1 expression on cells expressing  
1271 either sgCtrl or sg*STUB1* after 24 hours treatment with 5 ng/ml IFN $\gamma$  for D10 cells and  
1272 0.5 ng/ml IFN $\gamma$  for SK-MEL-23 cells.

1273 **c**, Flow cytometry analysis of IFN $\gamma$ -induced HLA-A/B/C expression on SK-MEL-23  
1274 melanoma cells expressing either sgCtrl or sg*STUB1* after 24 hours treatment with 0.5  
1275 ng/ml IFN $\gamma$  for SK-MEL-23.

1276 **d**, Differential gene expression of D10 and SK-MEL-147 melanoma cells lines after  
1277 treatment with IFN $\gamma$  for eight hours was used to derive an IFN $\gamma$  response gene set.

1278 **e**, Differential gene expression analysis of IFN $\gamma$  response genes (derived by treating  
1279 D10 and SK-MEL-147 melanoma cells with IFN $\gamma$  for eight hours, depicted in **d**) and  
1280 PID\_TNF\_PATHWAY genes in SK-MEL-147 melanoma cells co-cultured with MART-  
1281 1 T cells for eight hours.

1282 **f**, Difference in either IFN $\gamma$  response gene expression or expression of  
1283 PID\_TNF\_PATHWAY genes between sgCtrl and sg*STUB1*-expressing SK-MEL-147  
1284 melanoma cells following MART-1 T cell challenge for eight hours.

1285 **g**, Colony formation assay of SK-MEL-147 melanoma cells expressing sgCtrl or  
1286 sg*STUB1* treated with either vehicle or 50 ng/ml IFN $\gamma$  for five days.

1287 **h**, Quantification of colony formation assay shown in (**g**).

1288 **i**, Colony formation assay of SK-MEL-147 melanoma cells expressing sgCtrl or  
1289 sg*STUB1* treated with either no or MART-1 T cells for 24 hours and subsequent culture  
1290 for four days.

1291 **j**, Quantification of colony formation assay shown in (**i**).

1292 **k**, Colony formation assay of SK-MEL-147 melanoma cells expressing the indicated  
1293 sgRNAs that were co-cultured with either no T cell or MART-1 T cells at T cell :  
1294 melanoma cell ratios 1:16, 1:8 and 1:4 (left to right) for 24 hours and subsequent  
1295 culture for four days.

1296 **l**, Quantification of crystal violet stained colony formation assays from (**k**) at a T cell :  
1297 melanoma cell ratio of 1:16.

1298 Mean $\pm$ SD in (**a**), \*\*p=0.0034, \*p=0.012, multiple t-tests for three biological replicates.



1299 Mean±SD in **(b)**, \*\*\*\*p<0.0001 for SK-MEL-23, \*\*\*\*p<0.0001, unpaired t-test for five  
1300 biological replicates.

1301 Mean±SD in **(c)**, \*\*\*\*p<0.0001, unpaired t-test for five biological replicates.

1302 Average Z-score of respective genes in **(g)** from two biological replicates with paired  
1303 t-test.

1304 Mean±SD in **(h)**, \*p=0.0132, ordinary one-way ANOVA for four biological replicates  
1305 with Tukey post hoc testing.

1306 Mean±SD in **(j)**, \*\*\*p=0.0006, ordinary one-way ANOVA for four biological replicates  
1307 with Tukey post hoc testing.

1308 Mean±SD in **(l)**, n.s. p=0.0713, \*\*\*\*p<0.0001, ordinary one-way ANOVA for four  
1309 biological replicates with Tukey post hoc testing.

1310

1311

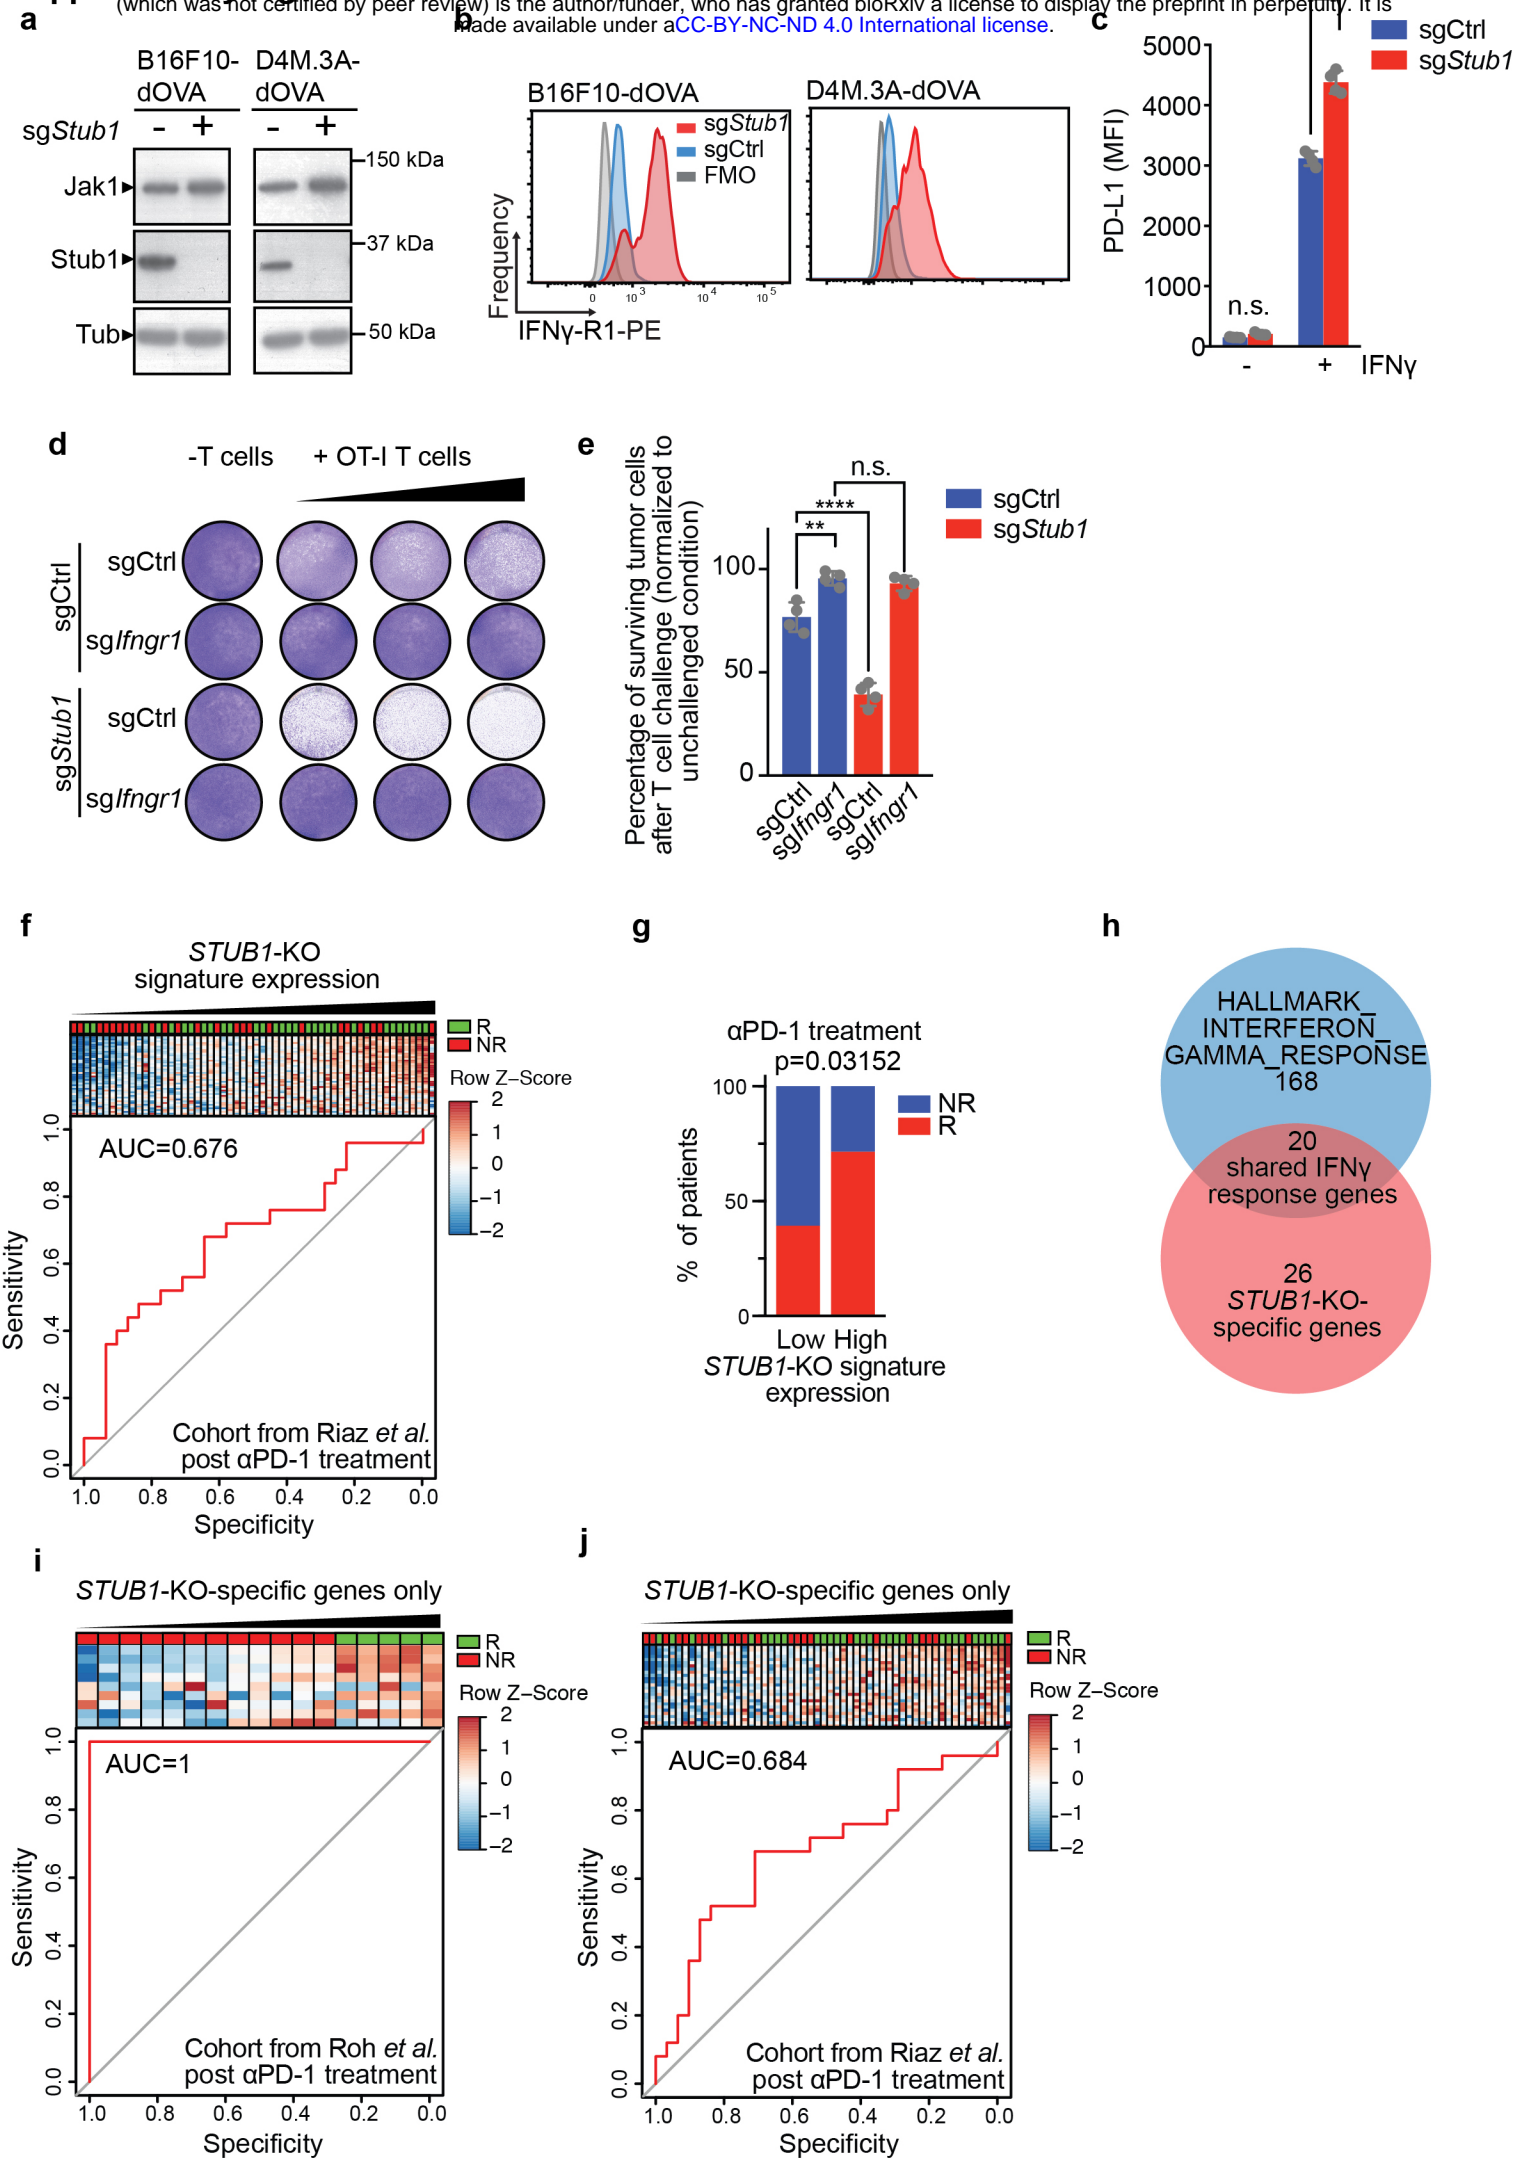

1312 **Supplementary Figure 5: STUB1 inactivation and anti-PD-1 treatment constitute**  
1313 **a rational combination therapy approach.**

1314 **a**, Immunoblot of murine melanoma cell lines expressing either sgCtrl or sg*Stub1*.  
1315 Whole cell lysates were blotted for the indicated proteins (TUB is Tubulin).

1316 **b**, Flow cytometry histograms showing *lfngr1* expression in indicated murine  
1317 melanoma cell lines expressing either sgCtrl (blue) or sg*Stub1* (red). FMO (grey) =  
1318 Fluorescence minus one, PE=Phycoerythrin.

1319 **c**, Flow cytometry analysis of IFN $\gamma$ -induced PD-L1 expression in B16F10-dOVA cells  
1320 expressing either sgCtrl or sg*Stub1*. Cells were treated with 12 ng/ml murine IFN $\gamma$  for  
1321 24 hours.

1322 **d**, Colony formation assay of B16F10-dOVA melanoma cells expressing the indicated  
1323 sgRNAs and co-cultured with either no T cells or OT-I T cells at T cell : melanoma cell  
1324 ratios 1:1, 2:1 and 4:1 (left to right).

1325 **e**, Quantification from (**d**) at a T cell : melanoma cell ratio of 4:1.

1326 **f**, Same analysis as in **Figure 5g**, for melanoma patients from the post  $\alpha$ PD-1-  
1327 treatment cohort of Riaz *et al.* 2017.

1328 **g**, Same analysis as in **Figure 5h**, for the post  $\alpha$ PD-1-treatment cohort of Riaz *et al.*  
1329 2017

1330 **h**, Venn diagram depicting the overlap between the  
1331 HALLMARK\_INTERFERON\_GAMMA\_RESPONSE gene set and the *STUB1*-KO  
1332 signature gene set.

1333 **i**, Same analysis as in **Figure 5g**, for the post  $\alpha$ PD-1-treatment cohort of Roh *et al.*  
1334 2017 using the expression of the 26 genes specific to the *STUB1*-KO signature  
1335 (outlined in **h**).

1336 **j**, Same analysis as in **Figure 5g**, for the post  $\alpha$ PD-1-treatment cohort of Riaz *et al.*  
1337 2017 using the expression of the 26 genes specific to the *STUB1*-KO signature  
1338 (outlined in **h**).

1339 Mean $\pm$ SD in (**c**), \*\*\*\*p  $p < 0.0001$ , n.s.  $p = 0.8893$ , ordinary one-way ANOVA for four  
1340 biological replicates with Tukey post hoc testing.

1341 Mean $\pm$ SD in (**e**), \*\*p=0.0012, \*\*\*\*p<0.0001, n.s. p=0.9012, ordinary one-way ANOVA  
1342 for four biological replicates with Tukey post hoc testing.
